# Supplementary material for: Comment on “Polycyclic aromatic hydrocarbons containing antiaromatic chalcogenopyrano[3,2-b]-chalcogenopyrans” by W. Chen, H. Zong, Y. Xie, J. Xu, J.-W. Cai, S.-D. Wang and G. Zhou, Org. Chem. Front., 2024, 11, 390
Source: Royal Society of Chemistry journal article supplement (doi:10.1039/d4qo01073f), 2024-01-01
Supplement: d4qo01073f1.pdf [file d4qo01073f1.pdf]

**Supporting Information: Comment on "Polycyclic aromatic hydrocarbons containing antiaromatic chalcogenopyrrole b]-chalcogenopyrans" by W. Chen, H. Zong, Y. Xie, J. Xu, J.-W. Cai, S.-D. Wang and G. Zhou, Org. Chem. Front., 2024, 11, 390.†**

Luis Soriano-Agueda,<sup>\*a</sup>

**Contents**

|          |                                                                         |           |
|----------|-------------------------------------------------------------------------|-----------|
| <b>1</b> | <b>Computational Details</b>                                            | <b>2</b>  |
| <b>2</b> | <b>Singlet and triplet state energies</b>                               | <b>3</b>  |
| <b>3</b> | <b>EDDB function: CAM-B3LYP and B3LYP</b>                               | <b>4</b>  |
| <b>4</b> | <b>Aromatic stabilization energies</b>                                  | <b>6</b>  |
| <b>5</b> | <b>Electronic Indices</b>                                               | <b>7</b>  |
| 5.1      | CAM-B3LYP . . . . .                                                     | 7         |
| 5.2      | B3LYP . . . . .                                                         | 14        |
| <b>6</b> | <b>Current density maps</b>                                             | <b>21</b> |
| <b>7</b> | <b>Cartesian coordinates of the optimized structures with CAM-B3LYP</b> | <b>29</b> |

# 1 Computational Details

All geometries were fully optimized using the CAM-B3LYP<sup>1</sup> and B3LYP<sup>2</sup> DFAs, in combination with the 6-311G(d,p) basis set,<sup>3</sup> and Grimme’s dispersion correction with Beck-Johnson damping D3(BJ).<sup>4</sup> The frequency analysis was used to confirm that the minimum was obtained.

We evaluated the  $\text{EDDB}_H(r)$  function,<sup>5</sup> that is, by excluding hydrogen atoms, which is recommended for organic molecules.<sup>6</sup> The  $\text{EDDB}_H$  function reflects the population of delocalized electrons across all conjugated bonds in a molecule. In addition, the  $\text{EDDB}_F$  function was estimated. Run EDDB program, requires the one-electron density matrix that was calculated at the CAM-B3LYP/6-311G(d,p) level in conjunction with the natural bond orbital (NBO) version 3 code.<sup>7</sup> The geometry optimizations and the EDDB functions ( $\text{EDDB}_H(r)$  and  $\text{EDDB}_F(r)$ ) were carried out in Gaussian 16 software.<sup>8</sup>

The calculation of the electronic aromaticity indices (AV1245,<sup>9</sup> AVmin,<sup>10</sup> and BOA<sup>11</sup>) employs the quantum theory of atoms in molecules<sup>12</sup> (QTAIM) atomic partition performed by the AIMAll software.<sup>13</sup> The atomic overlap matrices resulting from this partition and the wavefunction files (obtained with Gaussian 16 package<sup>8</sup>) are the input of the in-house ESI-3D code,<sup>11,14,15</sup> which provides AV1245, AVmin, BOA, Iring and MCI values. The numerical integrations of the atoms in the QTAIM have errors below 0.0004 (in all the molecules). The ESI-3D code is available upon request (ematito@gmail.com).

To quantify the electron current density ( $J$ ) in the bonds, the perturbed wave function was calculated through the Gauge-Independent Atomic Orbital (GIAO) method,<sup>16</sup> with the Gaussian 16 computational package. Then we use the gauge-including magnetically induced current method (GIMIC) method<sup>17</sup> which calculates the current flow passing through a plane perpendicular to the molecule. The plane was created in AIMAll software with a mesh size of 0.05 a.u. The length of the plane was 5 a.u. up and down from the origin. In all cases, the origin is located at the central bond’s midpoint. Finally, the surface was integrated using Paraview 4.2.0.<sup>18</sup> The current density maps display the current flowing through the plane lying 1 a.u. above the molecular plane.

## 2 Singlet and triplet state energies

Table S1: Energies for  $S = 0$  (singlets) and  $S = 1$  (triplets). The methodologies used were CAM-B3LYP/6-311G(d,p) and B3LYP/6-311G(d,p). For systems SS1 and SeSe1 it was not possible to obtain a minimum on the potential energy surface. All values in a.u.

| Molecule | CAM-B3LYP      |                | B3LYP          |                |
|----------|----------------|----------------|----------------|----------------|
|          | $S = 0$        | $S = 1$        | $S = 0$        | $S = 1$        |
| SS       | -1104.72971094 | -1104.69509478 | -1104.94938732 | -1104.91371215 |
| SSe      | -3108.15542818 | -3108.12065282 | -3108.28130263 | -3108.24576046 |
| SeSe     | -5111.58112866 | -5111.54630768 | -5111.61325463 | -5111.57797051 |
| SS1      | -1334.48518877 | -1334.43550758 | -1334.84960067 | –              |
| SSe1     | -3337.90962095 | -3337.87202143 | -3338.18011832 | -3338.14293585 |
| SeSe1    | -5341.33400127 | -5341.29691960 | -5341.51064915 | –              |
| SS2      | -1948.90125845 | -1948.86070188 | -1949.65406646 | -1949.61710221 |
| SSe2     | -3952.32619463 | -3952.28623344 | -3952.98511958 | -3952.94840715 |
| SeSe2    | -5955.75114957 | -5955.71154522 | -5956.31626918 | -5956.27992353 |

### 3 EDDB function: CAM-B3LYP and B3LYP

The Figure S1 shows the names assigned to each of the rings of the molecules, allowing a better analysis of Table S2.

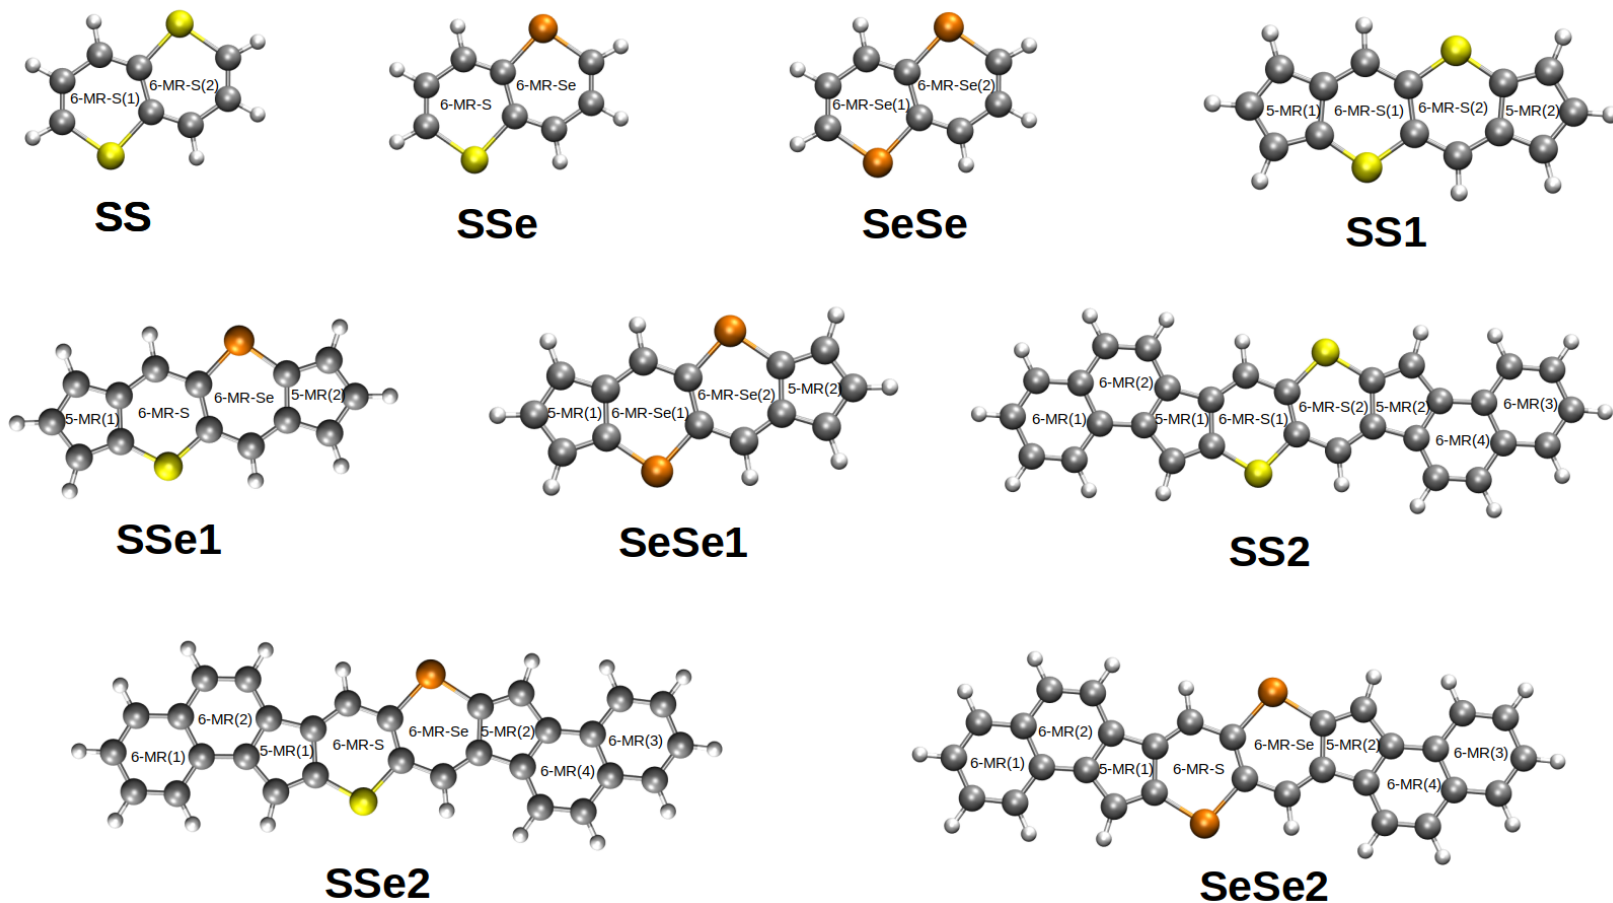

Figure S1: SS: Thiopyrano[3,2-b]thiopyran; SSe: Selenopyrano[3,2-b]thiopyran; SeSe: Selenopyrano[3,2-b]selenopyran; SS1: Cyclopenta[5,6]Thiopyrano[3,2-b]cyclopenta[e]Thiopyran; SSe1: Cyclopenta[5,6]Selenopyrano[3,2-b]cyclopenta[e]Thiopyran; SeSe1: Cyclopenta[5,6]Selenopyrano[3,2-b]cyclopenta[e]Selenopyran; polycyclic aromatic hydrocarbons containing chalcogenopyrano[3,2-b] chalcogenopyran : SS2, SSe2, SeSe2. Molecules optimized with the CAM-B3LYP/6-311G(d,p) methodology. White spheres: hydrogen atoms; gray spheres: carbon atoms; yellow spheres: sulfur atoms; orange spheres: selenium atoms.



Table S2: EDDB<sub>F</sub> values for the 5-MRs, 6-MRs, 6-MR-Se and for 6-MR-S. In parentheses the average values. The methodologies used were CAM-B3LYP/6-311G(d,p) and B3LYP/6-311G(d,p). All values in e

| Molecule | Ring       | CAM-B3LYP   | B3LYP       |
|----------|------------|-------------|-------------|
| SS       | 6-MR-S(1)  | 1.54 (0.26) | 1.71 (0.28) |
|          | 6-MR-S(2)  | 1.54 (0.26) | 1.71 (0.28) |
| SSe      | 6-MR-S     | 1.55 (0.26) | 1.72 (0.29) |
|          | 6-MR-Se    | 1.44 (0.24) | 1.63 (0.27) |
| SeSe     | 6-MR-Se(1) | 1.45 (0.24) | 1.64 (0.27) |
|          | 6-MR-Se(2) | 1.45 (0.24) | 1.64 (0.27) |
| SS1      | 5-MR(1)    | 1.20 (0.24) | 1.42 (0.28) |
|          | 5-MR(2)    | 1.20 (0.24) | 1.42 (0.28) |
|          | 6-MR-S(1)  | 1.82 (0.30) | 2.18 (0.36) |
|          | 6-MR-S(2)  | 1.82 (0.30) | 2.18 (0.36) |
| SSe1     | 5-MR(1)    | 1.24 (0.25) | 1.48 (0.30) |
|          | 5-MR(2)    | 1.10 (0.22) | 1.27 (0.25) |
|          | 6-MR-S     | 1.90 (0.32) | 2.29 (0.38) |
|          | 6-MR-Se    | 1.64 (0.27) | 2.01 (0.33) |
| SeSe1    | 5-MR(1)    | 1.12 (0.22) | 1.31 (0.26) |
|          | 5-MR(2)    | 1.12 (0.22) | 1.31 (0.26) |
|          | 6-MR-Se(1) | 1.71 (0.29) | 2.10 (0.35) |
|          | 6-MR-Se(2) | 1.71 (0.29) | 2.10 (0.35) |
| SS2      | 5-MR(1)    | 0.88 (0.18) | 1.09 (0.22) |
|          | 5-MR(2)    | 0.88 (0.18) | 1.09 (0.22) |
|          | 6-MR(1)    | 3.38 (0.56) | 3.50 (0.58) |
|          | 6-MR(2)    | 2.78 (0.46) | 2.95 (0.49) |
|          | 6-MR(3)    | 3.38 (0.56) | 3.50 (0.58) |
|          | 6-MR(4)    | 2.78 (0.46) | 2.95 (0.49) |
|          | 6-MR-S(1)  | 1.60 (0.27) | 1.94 (0.32) |
|          | 6-MR-S(2)  | 1.60 (0.27) | 1.94 (0.32) |
| SSe2     | 5-MR(1)    | 0.90 (0.18) | 1.12 (0.22) |
|          | 5-MR(2)    | 0.81 (0.16) | 1.00 (0.20) |
|          | 6-MR(1)    | 3.39 (0.56) | 3.51 (0.58) |
|          | 6-MR(2)    | 2.77 (0.46) | 2.94 (0.49) |
|          | 6-MR(3)    | 3.34 (0.56) | 3.46 (0.57) |
|          | 6-MR(4)    | 2.86 (0.48) | 3.03 (0.50) |
|          | 6-MR-S     | 1.66 (0.28) | 2.00 (0.33) |
|          | 6-MR-Se    | 1.50 (0.25) | 1.83 (0.31) |
| SeSe2    | 5-MR(1)    | 0.82 (0.16) | 1.02 (0.20) |
|          | 5-MR(2)    | 0.82 (0.16) | 1.02 (0.20) |
|          | 6-MR(1)    | 3.35 (0.56) | 3.47 (0.58) |
|          | 6-MR(2)    | 2.85 (0.47) | 3.02 (0.50) |
|          | 6-MR(3)    | 3.35 (0.56) | 3.47 (0.58) |
|          | 6-MR(4)    | 2.85 (0.47) | 3.02 (0.50) |
|          | 6-MR-Se(1) | 1.56 (0.26) | 1.90 (0.32) |
|          | 6-MR-Se(2) | 1.56 (0.26) | 1.90 (0.32) |

## 4 Aromatic stabilization energies

To calculate the aromatic stabilization energy (ASE) of SS, SSe and SeSe compounds we use a scheme similar to that reported for naphthalene.<sup>19</sup> The scheme reported by Dixit, V. and Singh, Y. shows good performance in predicting ASE for naphthalene. Therefore we set up the following reaction scheme:

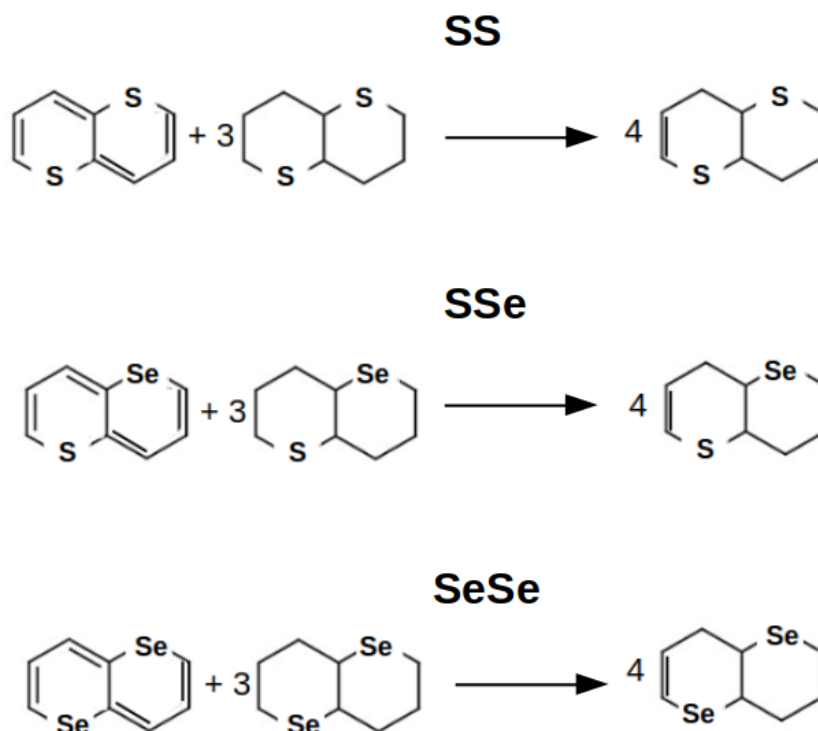

Figure S2: Chemical reactions of SS, SSe and SeSe compounds to calculate the aromatic stabilization energy.

Table S3: Aromatic stabilization energy were calculated using CAM-B3LYP/6-311G(d,p) and B3LYP/6-311G(d,p). All values in kcal/mol. The value of naphthalene is -63.96 kcal/mol taken from reference 19. Note that in the case of naphthalene the sign corresponds to an aromatic system.

| Molecule | CAM-B3LYP |              | B3LYP |              |
|----------|-----------|--------------|-------|--------------|
|          | ASE       | ASE per ring | ASE   | ASE per ring |
| SS       | 15.28     | 7.64         | 25.09 | 12.54        |
| SSe      | 14.33     | 7.16         | 24.03 | 12.01        |
| SeSe     | 22.20     | 11.10        | 24.15 | 12.07        |

## 5 Electronic Indices

### 5.1 CAM-B3LYP

Table S4: Electronic indices (BOA, AV1245, |AVmin|) for the 5-MRs, 6-MRs, 6-MR-Se and 6-MR-S. The methodology used was CAM-B3LYP/6-311G(d,p). By definition it is not possible to obtain AV1245 and |AVmin| for rings of 5 atoms.

| Molecule | Ring       | BOA   | MCI   | MCI <sup>1/n</sup> | Iring | Iring <sup>1/n</sup> | AV1245 | AVmin  |
|----------|------------|-------|-------|--------------------|-------|----------------------|--------|--------|
| SS       | 6-MR-S(1)  | 0.341 | 0.007 | 0.437              | 0.005 | 0.414                | 0.993  | 0.274  |
|          | 6-MR-S(2)  | 0.341 | 0.007 | 0.437              | 0.005 | 0.414                | 0.993  | 0.273  |
| SSe      | 6-MR-S     | 0.337 | 0.007 | 0.437              | 0.005 | 0.414                | 1.069  | 0.253  |
|          | 6-MR-Se    | 0.343 | 0.007 | 0.437              | 0.005 | 0.414                | 0.931  | 0.270  |
| SeSe     | 6-MR-Se(1) | 0.340 | 0.007 | 0.437              | 0.005 | 0.414                | 1.003  | 0.253  |
|          | 6-MR-Se(2) | 0.340 | 0.007 | 0.437              | 0.005 | 0.414                | 1.003  | 0.252  |
| SS1      | 5-MR(1)    | 1.310 | 0.017 | 0.443              | 0.020 | 0.457                | –      | –      |
|          | 5-MR(2)    | 1.400 | 0.017 | 0.443              | 0.020 | 0.457                | –      | –      |
|          | 6-MR-S(1)  | 0.245 | 0.006 | 0.426              | 0.006 | 0.426                | 0.833  | -0.903 |
|          | 6-MR-S(2)  | 0.245 | 0.006 | 0.426              | 0.006 | 0.426                | 0.833  | -0.903 |
| SSe1     | 5-MR(1)    | 1.300 | 0.017 | 0.443              | 0.020 | 0.457                | –      | –      |
|          | 5-MR(2)    | 0.997 | 0.017 | 0.443              | 0.020 | 0.457                | –      | –      |
|          | 6-MR-S     | 0.244 | 0.007 | 0.437              | 0.006 | 0.426                | 0.878  | -0.988 |
|          | 6-MR-Se    | 0.258 | 0.006 | 0.426              | 0.005 | 0.414                | 0.808  | -0.646 |
| SeSe1    | 5-MR(1)    | 1.348 | 0.017 | 0.443              | 0.020 | 0.457                | –      | –      |
|          | 5-MR(1)    | 1.415 | 0.017 | 0.443              | 0.020 | 0.457                | –      | –      |
|          | 6-MR-Se(1) | 0.259 | 0.006 | 0.426              | 0.005 | 0.414                | 0.860  | -0.707 |
|          | 6-MR-Se(2) | 0.259 | 0.006 | 0.426              | 0.005 | 0.414                | 0.860  | -0.708 |
| SS2      | 5-MR(1)    | 1.231 | 0.012 | 0.413              | 0.015 | 0.432                | –      | –      |
|          | 5-MR(2)    | 1.268 | 0.012 | 0.413              | 0.015 | 0.432                | –      | –      |
|          | 6-MR(1)    | 0.149 | 0.041 | 0.587              | 0.029 | 0.554                | 6.366  | 4.367  |
|          | 6-MR(2)    | 0.132 | 0.027 | 0.548              | 0.020 | 0.521                | 4.252  | 3.007  |
|          | 6-MR(3)    | 0.149 | 0.041 | 0.587              | 0.029 | 0.554                | 6.366  | 4.367  |
|          | 6-MR(4)    | 0.132 | 0.027 | 0.548              | 0.020 | 0.521                | 4.252  | 3.007  |
|          | 6-MR-S(1)  | 0.269 | 0.006 | 0.426              | 0.005 | 0.414                | 0.896  | -0.430 |
|          | 6-MR-S(2)  | 0.269 | 0.006 | 0.426              | 0.005 | 0.414                | 0.896  | -0.430 |
| SSe2     | 5-MR(1)    | 1.227 | 0.012 | 0.413              | 0.015 | 0.432                | –      | –      |
|          | 5-MR(2)    | 0.860 | 0.012 | 0.413              | 0.015 | 0.432                | –      | –      |
|          | 6-MR(1)    | 0.148 | 0.041 | 0.587              | 0.029 | 0.554                | 6.380  | 4.386  |
|          | 6-MR(2)    | 0.133 | 0.027 | 0.548              | 0.020 | 0.521                | 4.221  | 2.987  |
|          | 6-MR(3)    | 0.152 | 0.040 | 0.585              | 0.028 | 0.551                | 6.305  | 4.286  |
|          | 6-MR(4)    | 0.129 | 0.028 | 0.551              | 0.021 | 0.525                | 4.392  | 3.097  |
|          | 6-MR-S     | 0.270 | 0.007 | 0.437              | 0.006 | 0.426                | 0.939  | -0.461 |
|          | 6-MR-Se    | 0.279 | 0.006 | 0.426              | 0.005 | 0.414                | 0.854  | -0.284 |
| SeSe2    | 5-MR(1)    | 1.256 | 0.012 | 0.413              | 0.015 | 0.432                | –      | –      |
|          | 5-MR(2)    | 0.860 | 0.012 | 0.413              | 0.015 | 0.432                | –      | –      |
|          | 6-MR(1)    | 0.152 | 0.040 | 0.585              | 0.028 | 0.551                | 6.315  | 4.301  |
|          | 6-MR(2)    | 0.129 | 0.028 | 0.551              | 0.021 | 0.525                | 4.366  | 3.079  |
|          | 6-MR(3)    | 0.152 | 0.040 | 0.585              | 0.028 | 0.551                | 6.315  | 4.301  |
|          | 6-MR(4)    | 0.129 | 0.028 | 0.551              | 0.021 | 0.525                | 4.366  | 3.079  |
|          | 6-MR-Se(1) | 0.281 | 0.006 | 0.426              | 0.005 | 0.414                | 0.899  | -0.304 |
|          | 6-MR-Se(2) | 0.281 | 0.006 | 0.426              | 0.005 | 0.414                | 0.899  | -0.304 |

## AVmin colored

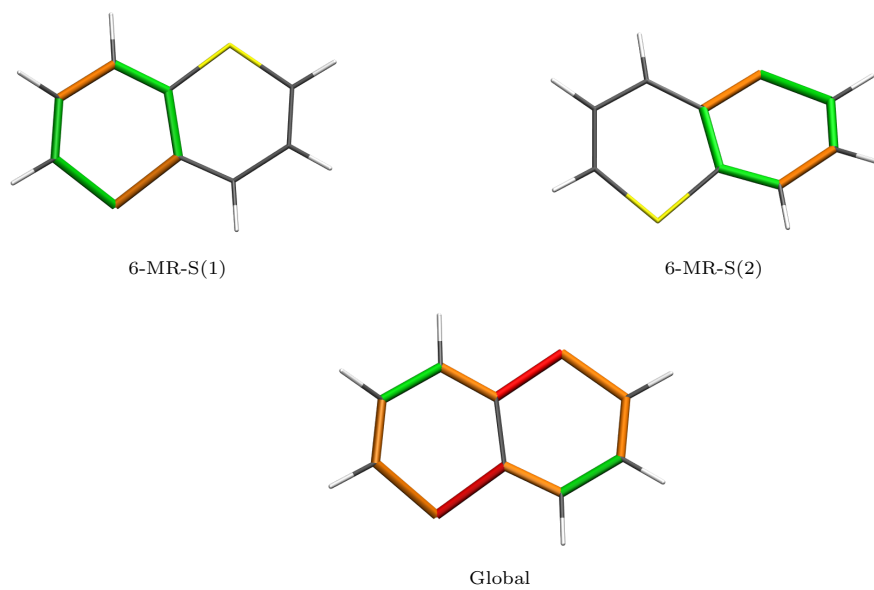

Figure S3: AVmin colored representation across of 6-MRs and global circuits in SS molecule. Green, orange, and red colors indicate bond contributions to conjugation that are, respectively, 75-100%, 5-75%, and 0-25%.

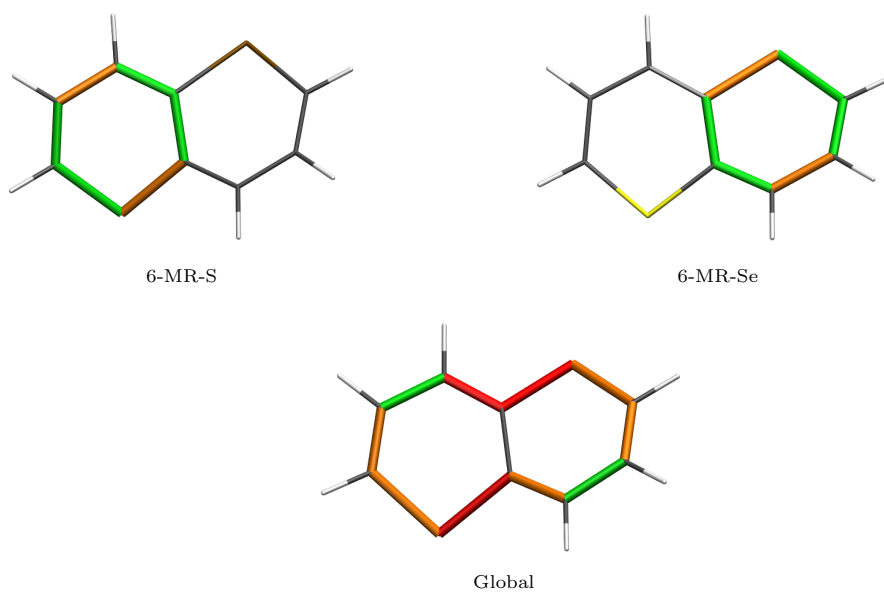

Figure S4: AVmin colored representation across of 6-MRs and global circuits in SSe molecule. Green, orange, and red colors indicate bond contributions to conjugation that are, respectively, 75-100%, 5-75%, and 0-25%.

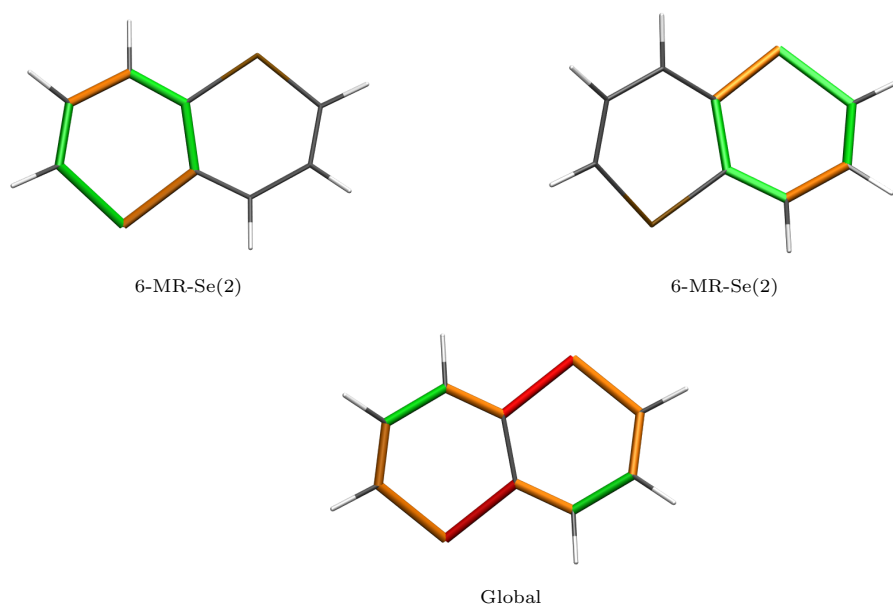

Figure S5: AVmin colored representation across of 6-MRs and global circuits in SeSe molecule. Green, orange, and red colors indicate bond contributions to conjugation that are, respectively, 75-100%, 5-75%, and 0-25%.

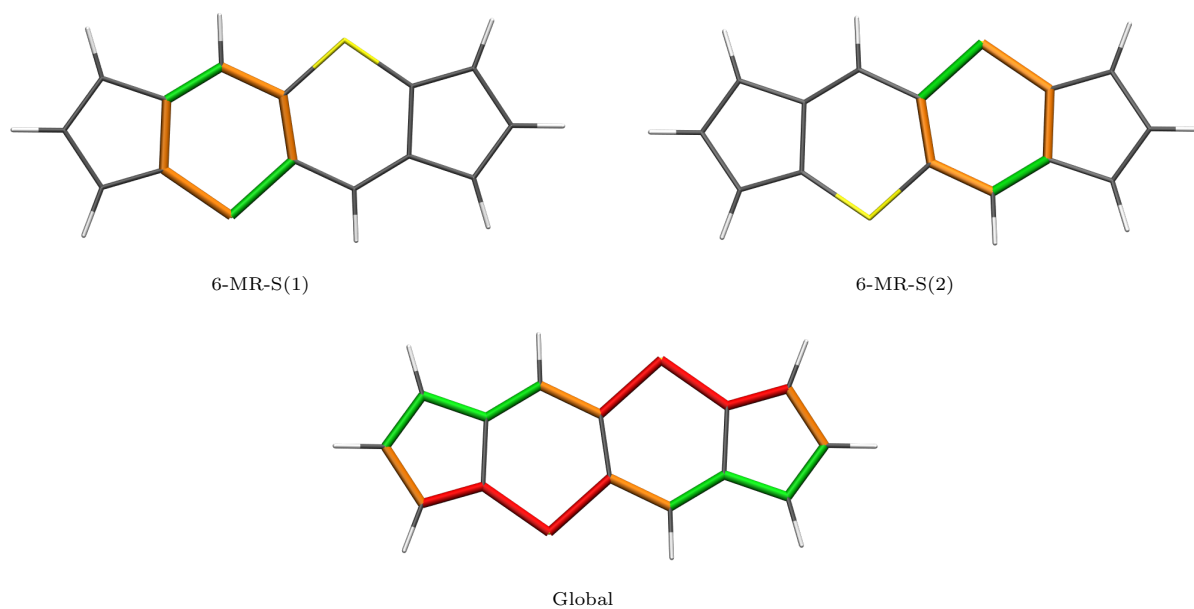

Figure S6: AVmin colored representation across of 6-MRs and global circuits in SS1 molecule. By definition it is not possible to obtain AVmin for rings of 5 atoms. Green, orange, and red colors indicate bond contributions to conjugation that are, respectively, 75-100%, 5-75%, and 0-25%.

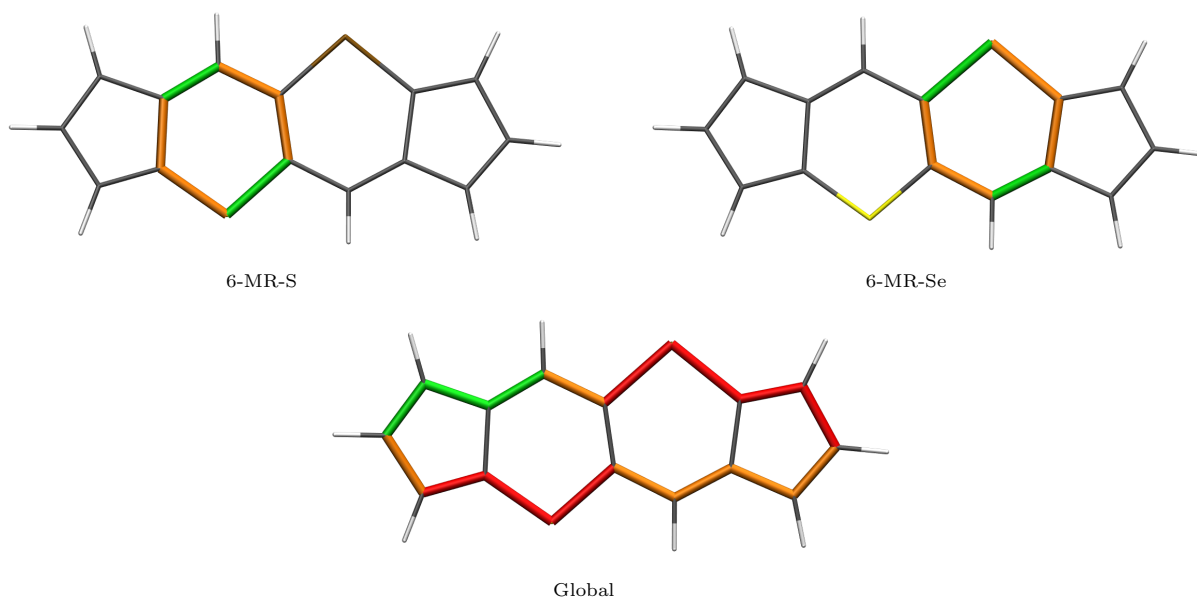

Figure S7: AVmin colored representation across a 6-MR and global circuits in SSe1 molecule. By definition it is not possible to obtain AVmin for rings of 5 atoms. Green, orange, and red colors indicate bond contributions to conjugation that are, respectively, 75-100%, 5-75%, and 0-25%.

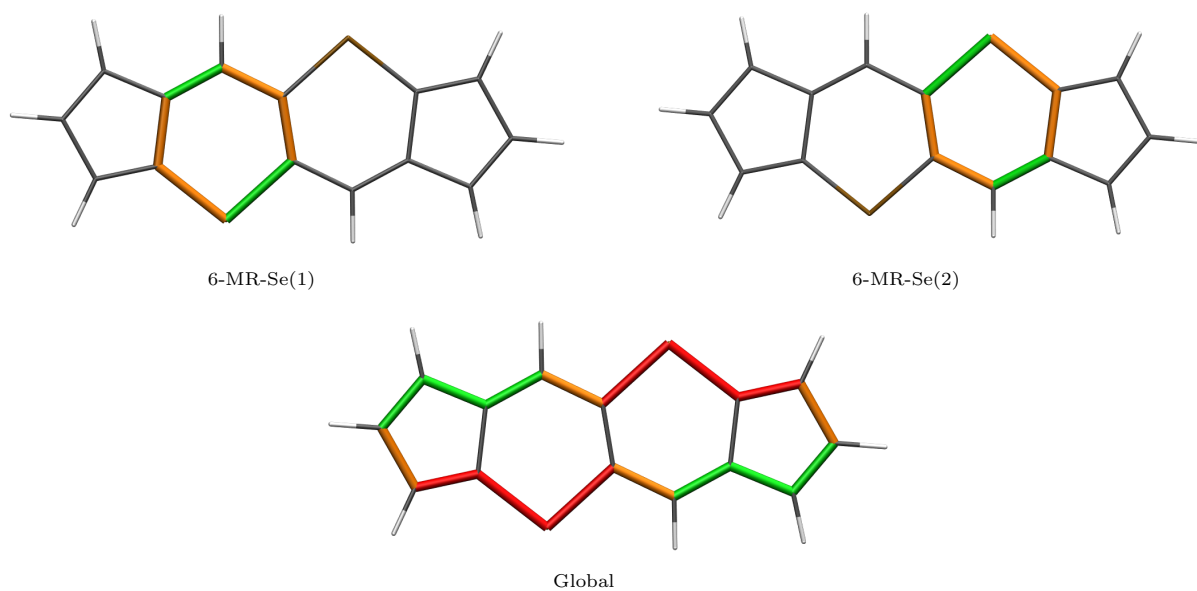

Figure S8: AVmin colored representation across a 6-MR and global circuits in SeSe1 molecule. By definition it is not possible to obtain AVmin for rings of 5 atoms. Green, orange, and red colors indicate bond contributions to conjugation that are, respectively, 75-100%, 5-75%, and 0-25%.

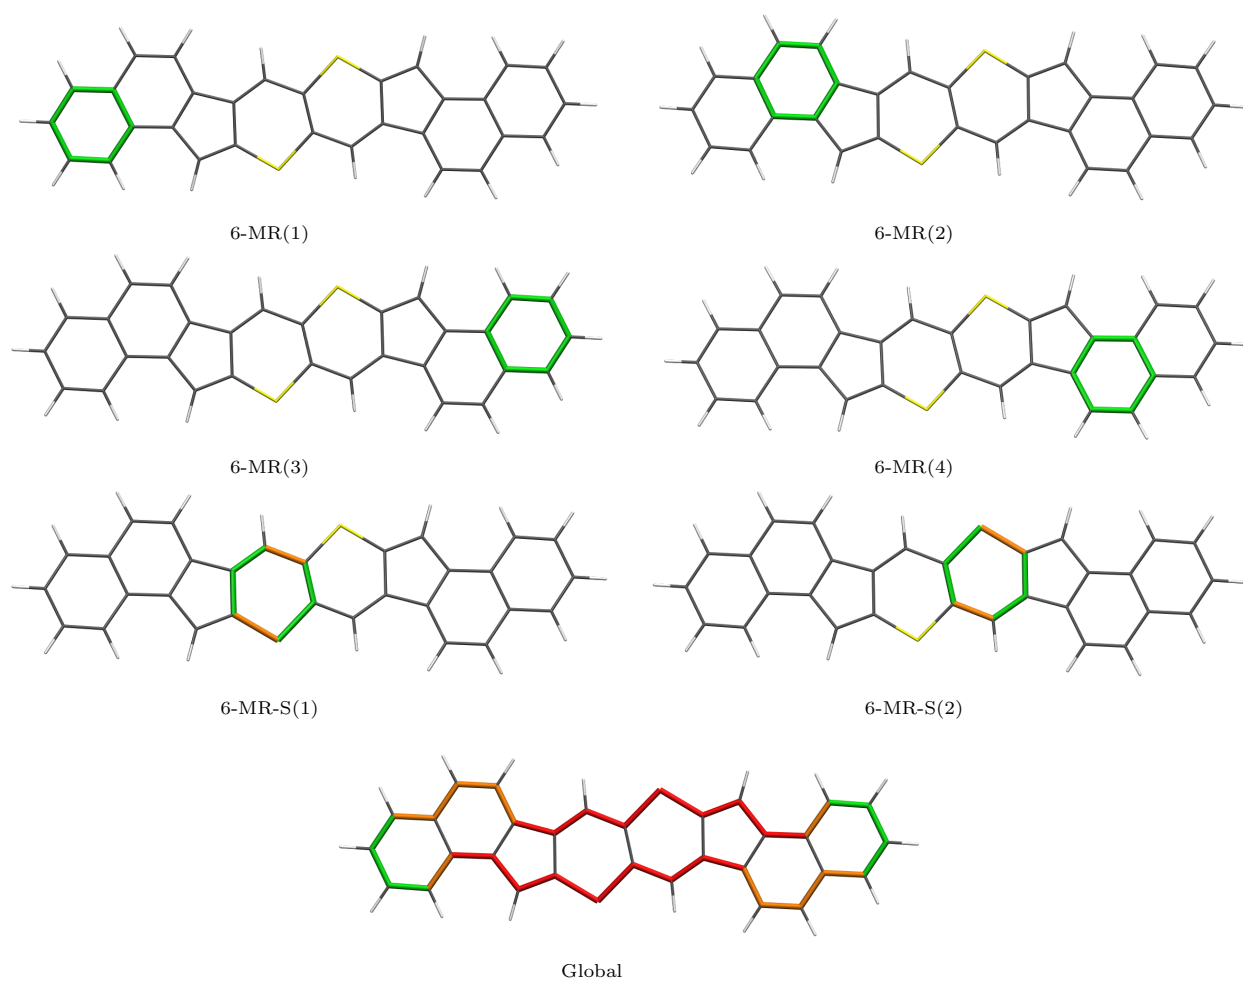

Figure S9: AVmin colored representation across a 6-MR and global circuits in SS2 molecule. By definition it is not possible to obtain AVmin for rings of 5 atoms. Green, orange, and red colors indicate bond contributions to conjugation that are, respectively, 75-100%, 5-75%, and 0-25%.

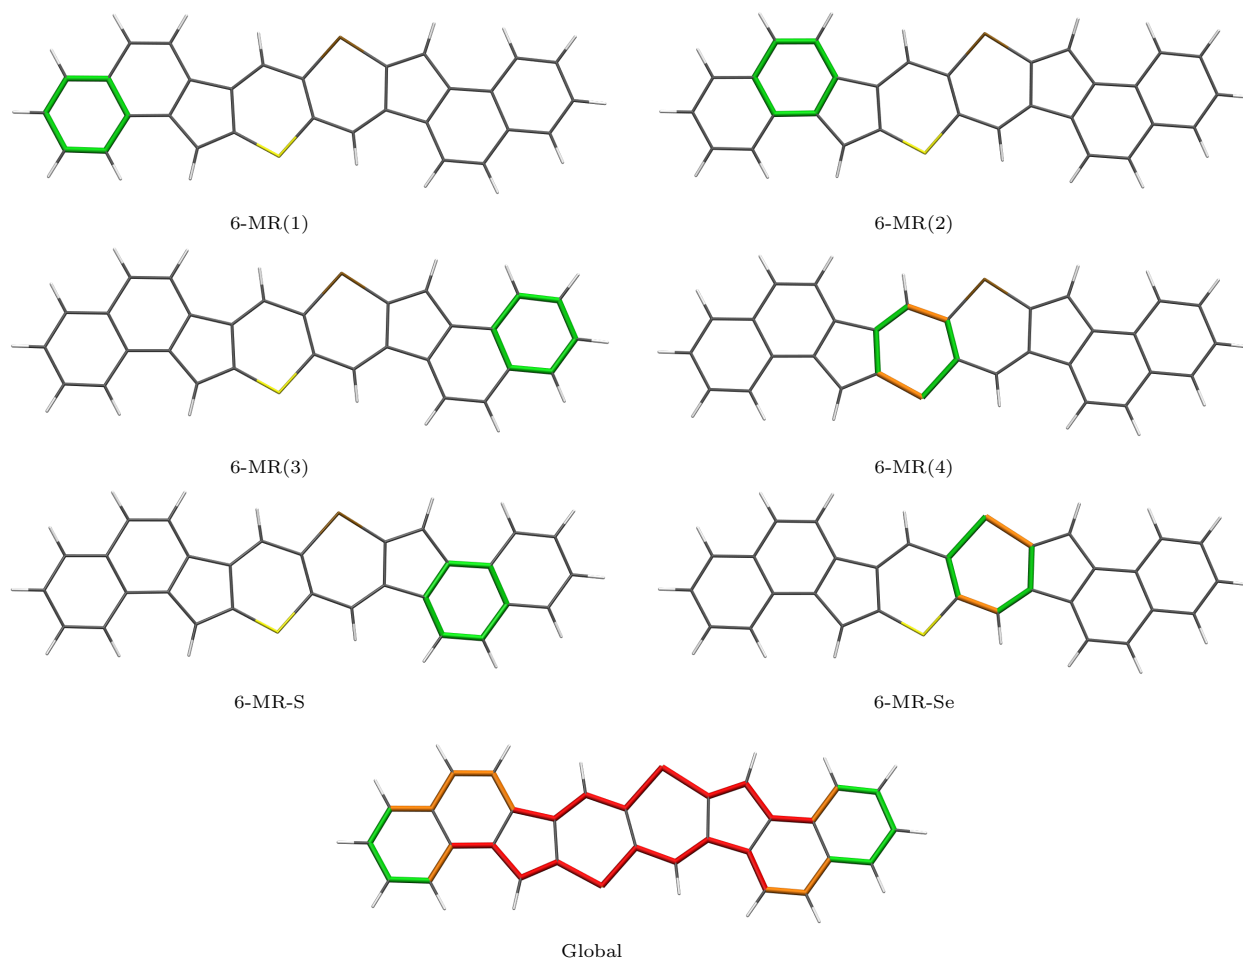

Figure S10: AVmin colored representation across a 6-MR and global circuits in SSe2 molecule. By definition it is not possible to obtain AVmin for rings of 5 atoms. Green, orange, and red colors indicate bond contributions to conjugation that are, respectively, 75-100%, 5-75%, and 0-25%.



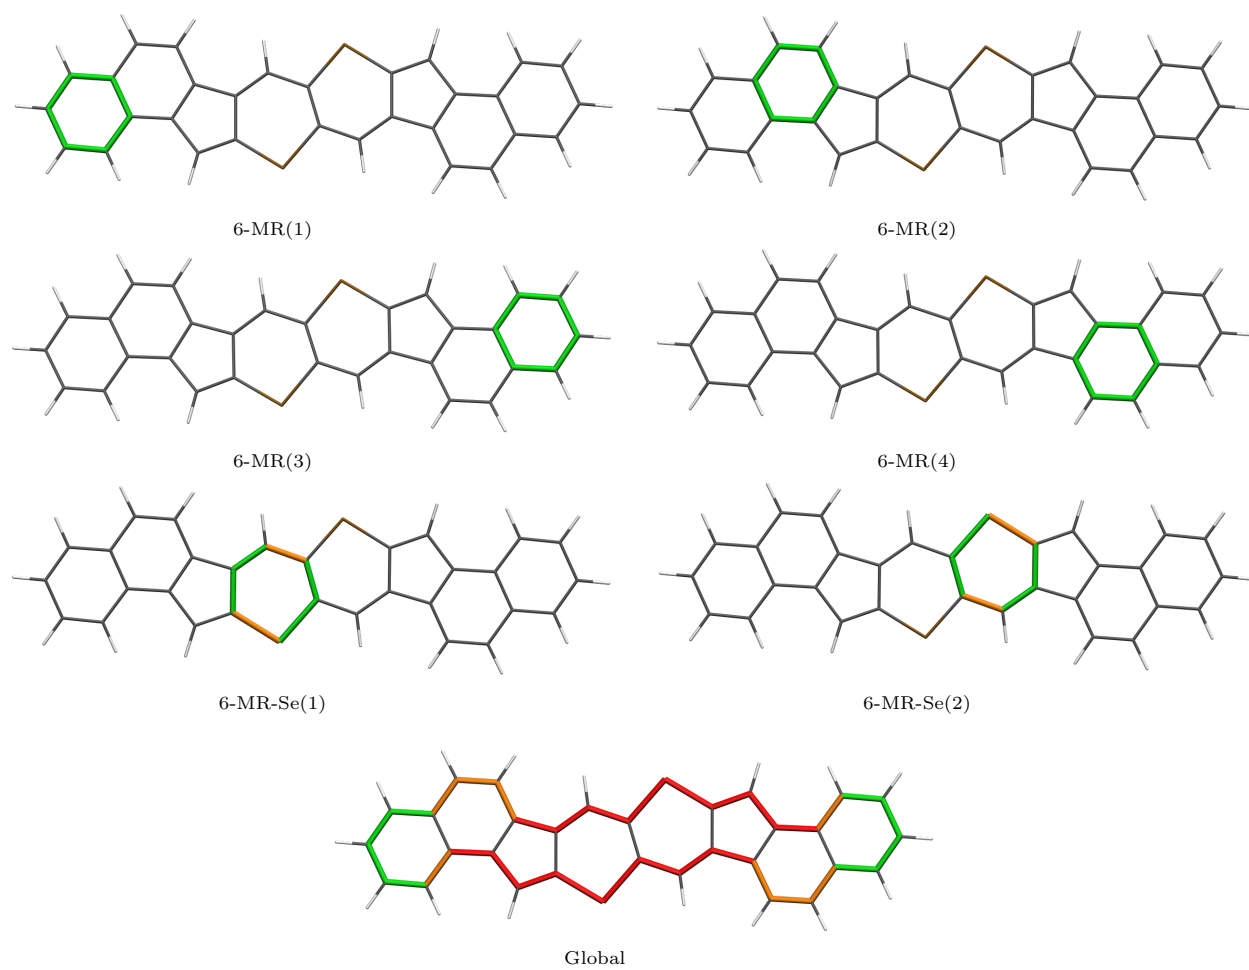

Figure S11: AVmin colored representation across a 6-MR and global circuits in SeSe<sub>2</sub> molecule. By definition it is not possible to obtain AVmin for rings of 5 atoms. Green, orange, and red colors indicate bond contributions to conjugation that are, respectively, 75-100%, 5-75%, and 0-25%.

## 5.2 B3LYP

Table S5: Electronic indices (BOA, AV1245, |AVmin|) for the 5-MRs, 6-MRs, 6-MR-Se and 6-MR-S. The methodology used was B3LYP/6-311G(d,p). By definition it is not possible to obtain AV1245 and |AVmin| for rings of 5 atoms.

| Molecule | Ring       | BOA   | MCI   | MCI <sup>1/n</sup> | Iring | Iring <sup>1/n</sup> | AV1245 | AVmin  |
|----------|------------|-------|-------|--------------------|-------|----------------------|--------|--------|
| SS       | 6-MR-S(1)  | 0.296 | 0.009 | 0.456              | 0.006 | 0.006                | 1.272  | 0.447  |
|          | 6-MR-S(2)  | 0.296 | 0.009 | 0.456              | 0.006 | 0.006                | 1.272  | 0.447  |
| SSe      | 6-MR-S     | 0.290 | 0.009 | 0.456              | 0.007 | 0.007                | 1.362  | 0.433  |
|          | 6-MR-Se    | 0.290 | 0.008 | 0.447              | 0.006 | 0.006                | 1.230  | 0.455  |
| SeSe     | 6-MR-Se(1) | 0.289 | 0.009 | 0.456              | 0.006 | 0.006                | 1.318  | 0.442  |
|          | 6-MR-Se(2) | 0.289 | 0.009 | 0.456              | 0.006 | 0.006                | 1.318  | 0.442  |
| SS1      | 5-MR(1)    | 1.254 | 0.019 | 0.453              | 0.022 | 0.022                | –      | –      |
|          | 5-MR(2)    | 1.372 | 0.019 | 0.453              | 0.022 | 0.022                | –      | –      |
|          | 6-MR-S(1)  | 0.201 | 0.007 | 0.437              | 0.006 | 0.006                | 0.782  | 0.885  |
|          | 6-MR-S(2)  | 0.201 | 0.007 | 0.437              | 0.006 | 0.006                | 0.782  | 0.885  |
| SSe1     | 5-MR(1)    | 1.242 | 0.019 | 0.453              | 0.023 | 0.023                | –      | –      |
|          | 5-MR(2)    | 0.982 | 0.019 | 0.453              | 0.022 | 0.022                | –      | –      |
|          | 6-MR-S     | 0.201 | 0.007 | 0.437              | 0.006 | 0.006                | 0.810  | 0.949  |
|          | 6-MR-Se    | 0.212 | 0.006 | 0.426              | 0.006 | 0.006                | 0.797  | -0.714 |
| SeSe1    | 5-MR(1)    | 1.293 | 0.019 | 0.453              | 0.023 | 0.023                | –      | –      |
|          | 5-MR(1)    | 1.386 | 0.019 | 0.453              | 0.023 | 0.023                | –      | –      |
|          | 6-MR-Se(1) | 0.213 | 0.007 | 0.437              | 0.006 | 0.006                | 0.835  | -0.789 |
|          | 6-MR-Se(2) | 0.213 | 0.007 | 0.437              | 0.006 | 0.006                | 0.835  | -0.789 |
| SS2      | 5-MR(1)    | 1.184 | 0.014 | 0.426              | 0.017 | 0.017                | –      | –      |
|          | 5-MR(2)    | 1.236 | 0.014 | 0.426              | 0.017 | 0.017                | –      | –      |
|          | 6-MR(1)    | 0.119 | 0.040 | 0.585              | 0.028 | 0.028                | 6.153  | 4.065  |
|          | 6-MR(2)    | 0.095 | 0.026 | 0.544              | 0.019 | 0.019                | 3.860  | 2.655  |
|          | 6-MR(3)    | 0.119 | 0.040 | 0.585              | 0.028 | 0.028                | 6.153  | 4.065  |
|          | 6-MR(4)    | 0.095 | 0.026 | 0.544              | 0.019 | 0.019                | 3.860  | 2.655  |
|          | 6-MR-S(1)  | 0.222 | 0.007 | 0.437              | 0.006 | 0.006                | 0.914  | -0.404 |
|          | 6-MR-S(2)  | 0.222 | 0.007 | 0.437              | 0.006 | 0.006                | 0.914  | -0.404 |
| SSe2     | 5-MR(1)    | 1.180 | 0.014 | 0.426              | 0.017 | 0.017                | –      | –      |
|          | 5-MR(2)    | 0.856 | 0.014 | 0.426              | 0.017 | 0.017                | –      | –      |
|          | 6-MR(1)    | 0.118 | 0.040 | 0.585              | 0.028 | 0.028                | 6.165  | 4.084  |
|          | 6-MR(2)    | 0.096 | 0.025 | 0.541              | 0.019 | 0.019                | 3.825  | 2.634  |
|          | 6-MR(3)    | 0.122 | 0.040 | 0.585              | 0.028 | 0.028                | 6.096  | 3.985  |
|          | 6-MR(4)    | 0.091 | 0.026 | 0.544              | 0.020 | 0.020                | 3.998  | 2.735  |
|          | 6-MR-S     | 0.223 | 0.007 | 0.437              | 0.006 | 0.006                | 0.948  | -0.438 |
|          | 6-MR-Se    | 0.229 | 0.006 | 0.426              | 0.006 | 0.006                | 0.910  | -0.238 |
| SeSe2    | 5-MR(1)    | 1.211 | 0.014 | 0.426              | 0.017 | 0.017                | –      | –      |
|          | 5-MR(2)    | 0.856 | 0.014 | 0.426              | 0.017 | 0.017                | –      | –      |
|          | 6-MR(1)    | 0.122 | 0.040 | 0.585              | 0.028 | 0.028                | 6.105  | 4.000  |
|          | 6-MR(2)    | 0.092 | 0.026 | 0.544              | 0.020 | 0.020                | 3.969  | 2.716  |
|          | 6-MR(3)    | 0.122 | 0.040 | 0.585              | 0.028 | 0.028                | 6.105  | 4.000  |
|          | 6-MR(4)    | 0.092 | 0.026 | 0.544              | 0.020 | 0.020                | 3.969  | 2.716  |
|          | 6-MR-Se(1) | 0.232 | 0.007 | 0.437              | 0.006 | 0.006                | 0.947  | -0.261 |
|          | 6-MR-Se(2) | 0.232 | 0.007 | 0.437              | 0.006 | 0.006                | 0.947  | -0.261 |

## AVmin colored

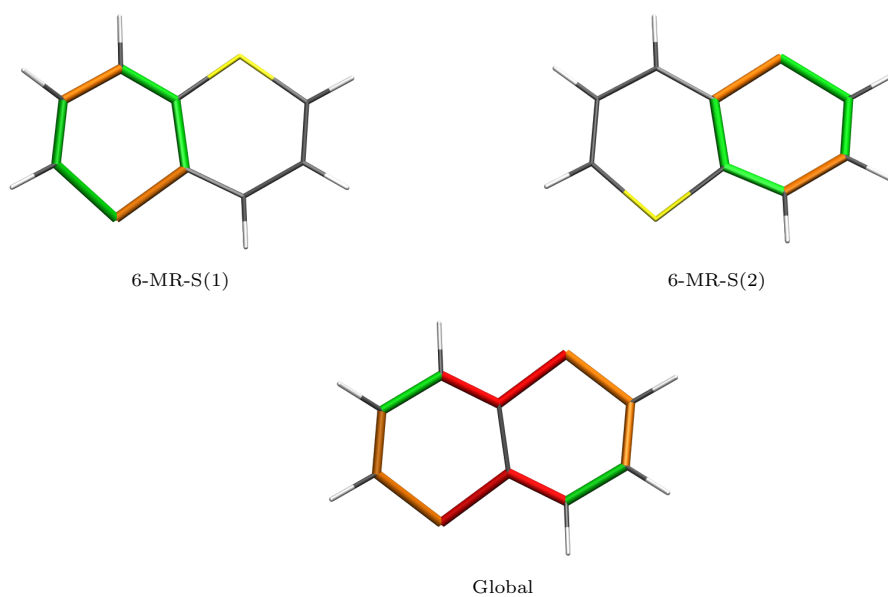

Figure S12: AVmin colored representation across of 6-MRs and global circuits in SS molecule. Green, orange, and red colors indicate bond contributions to conjugation that are, respectively, 75-100%, 5-75%, and 0-25%.

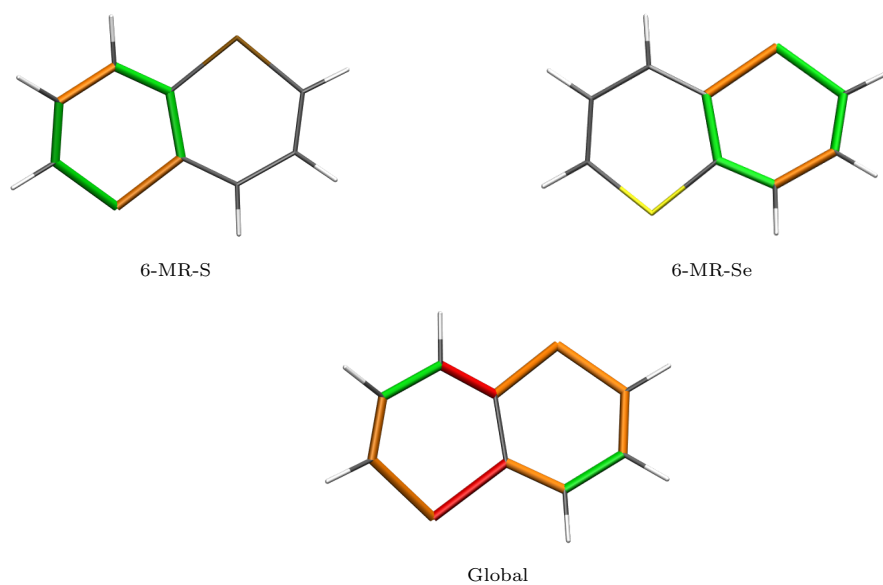

Figure S13: AVmin colored representation across of 6-MRs and global circuits in SSe molecule. Green, orange, and red colors indicate bond contributions to conjugation that are, respectively, 75-100%, 5-75%, and 0-25%.

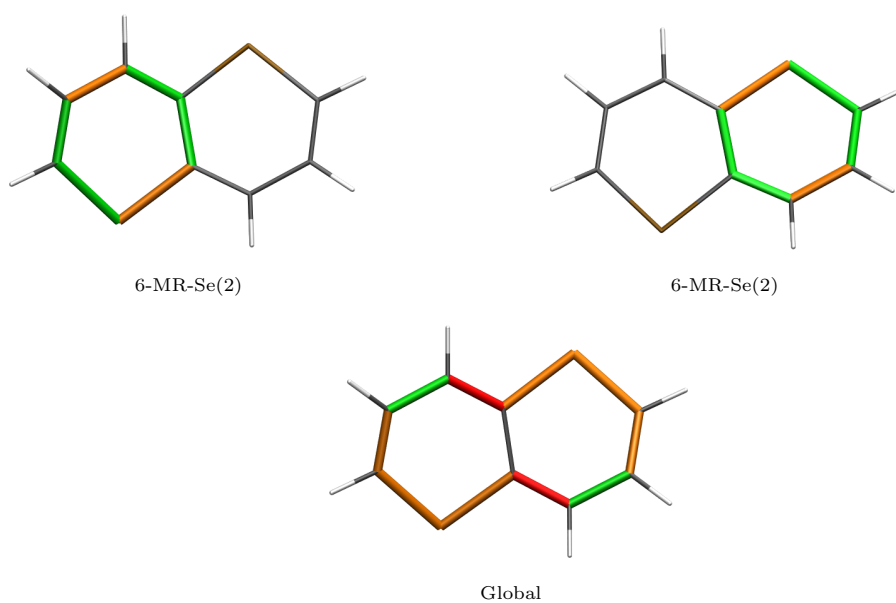

Figure S14: AVmin colored representation across of 6-MRs and global circuits in SeSe molecule. Green, orange, and red colors indicate bond contributions to conjugation that are, respectively, 75-100%, 5-75%, and 0-25%.

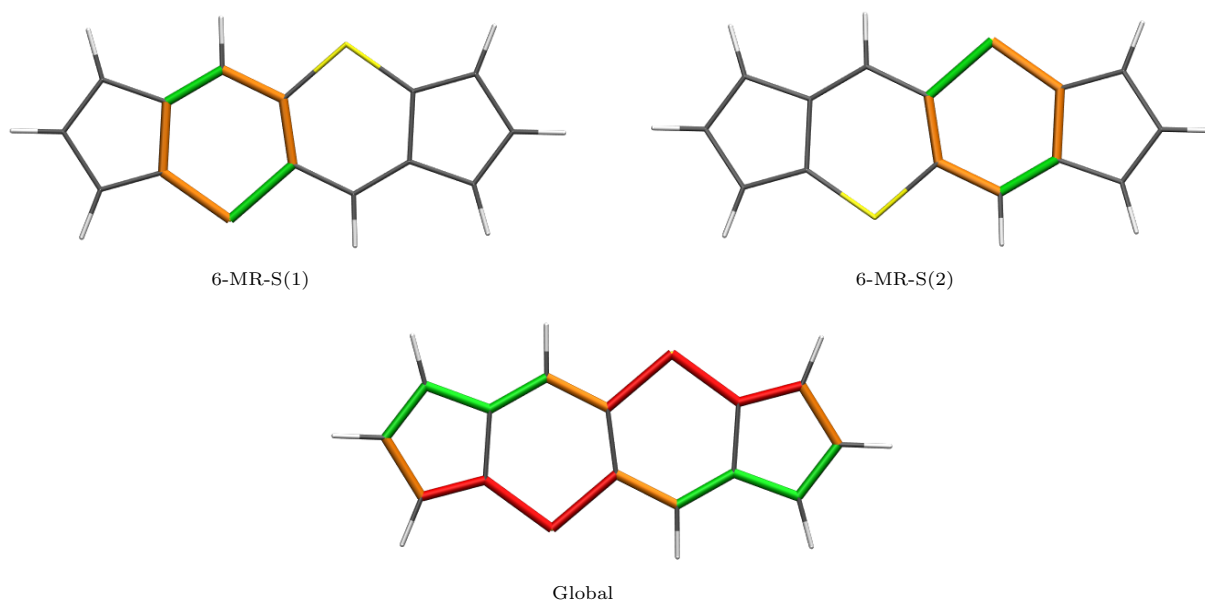

Figure S15: AVmin colored representation across of 6-MRs and global circuits in SS1 molecule. By definition it is not possible to obtain AVmin for rings of 5 atoms. Green, orange, and red colors indicate bond contributions to conjugation that are, respectively, 75-100%, 5-75%, and 0-25%.

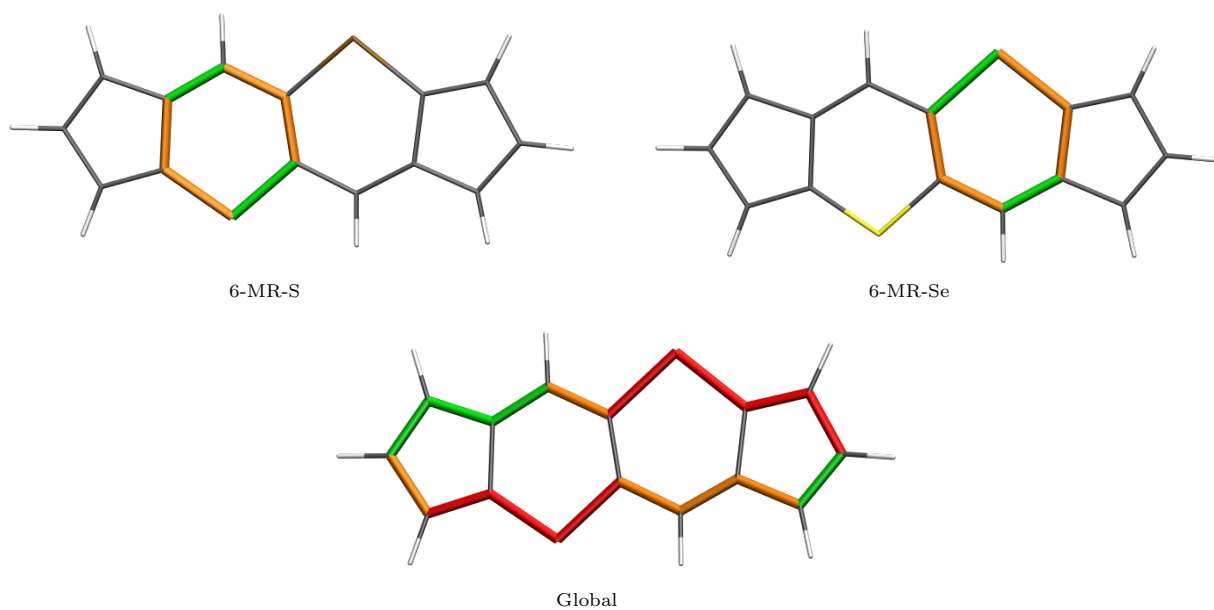

Figure S16: AVmin colored representation across a 6-MR and global circuits in SSe1 molecule. By definition it is not possible to obtain AVmin for rings of 5 atoms. Green, orange, and red colors indicate bond contributions to conjugation that are, respectively, 75-100%, 5-75%, and 0-25%.

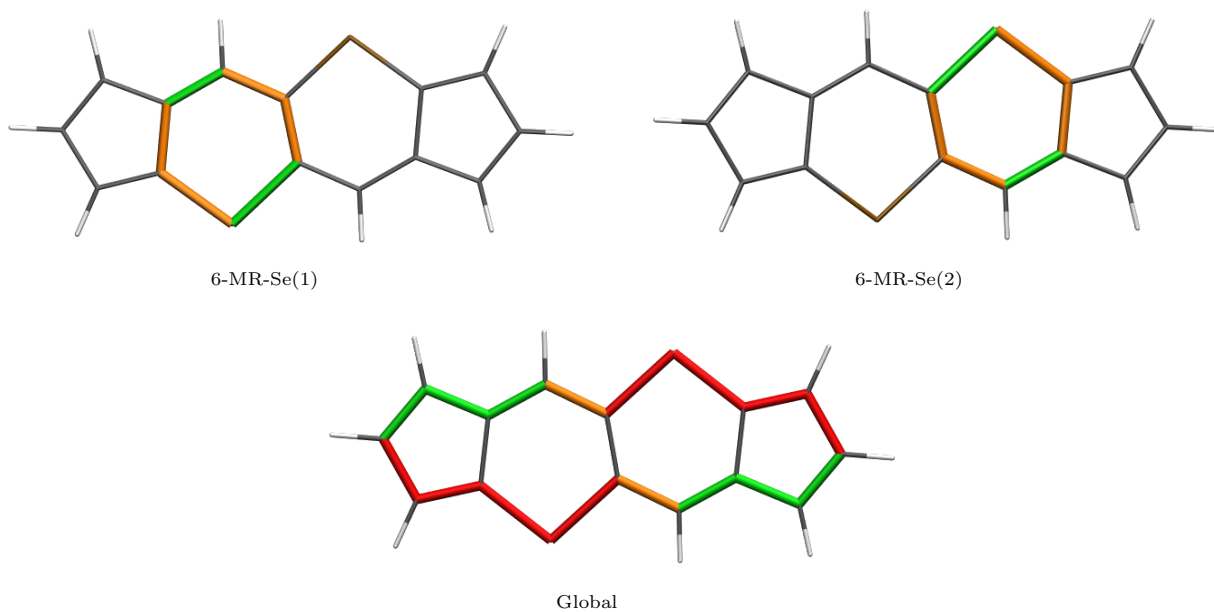

Figure S17: AVmin colored representation across a 6-MR and global circuits in SeSe1 molecule. By definition it is not possible to obtain AVmin for rings of 5 atoms. Green, orange, and red colors indicate bond contributions to conjugation that are, respectively, 75-100%, 5-75%, and 0-25%.

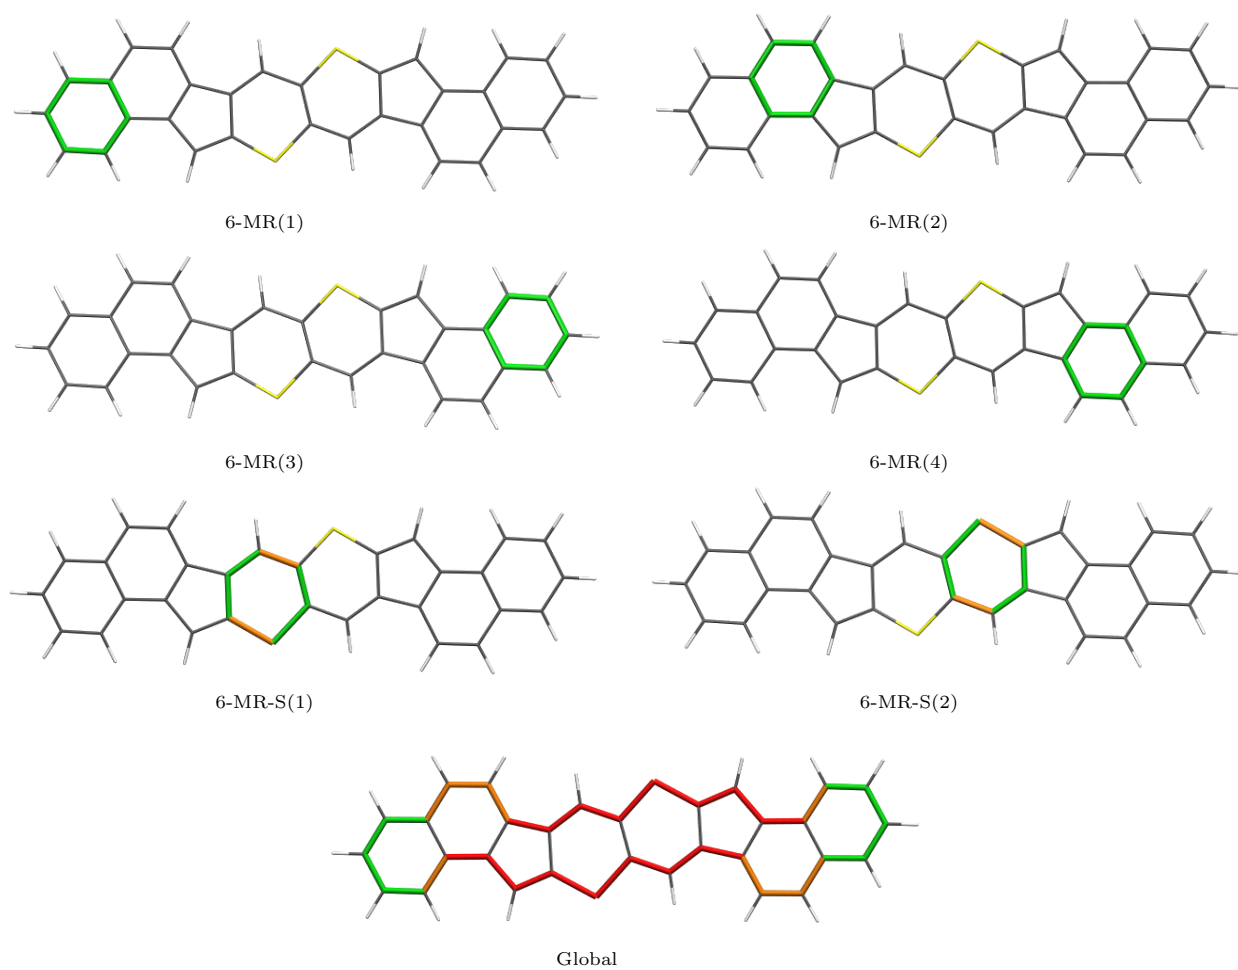

Figure S18: AVmin colored representation across a 6-MR and global circuits in SS2 molecule. By definition it is not possible to obtain AVmin for rings of 5 atoms. Green, orange, and red colors indicate bond contributions to conjugation that are, respectively, 75-100%, 5-75%, and 0-25%.

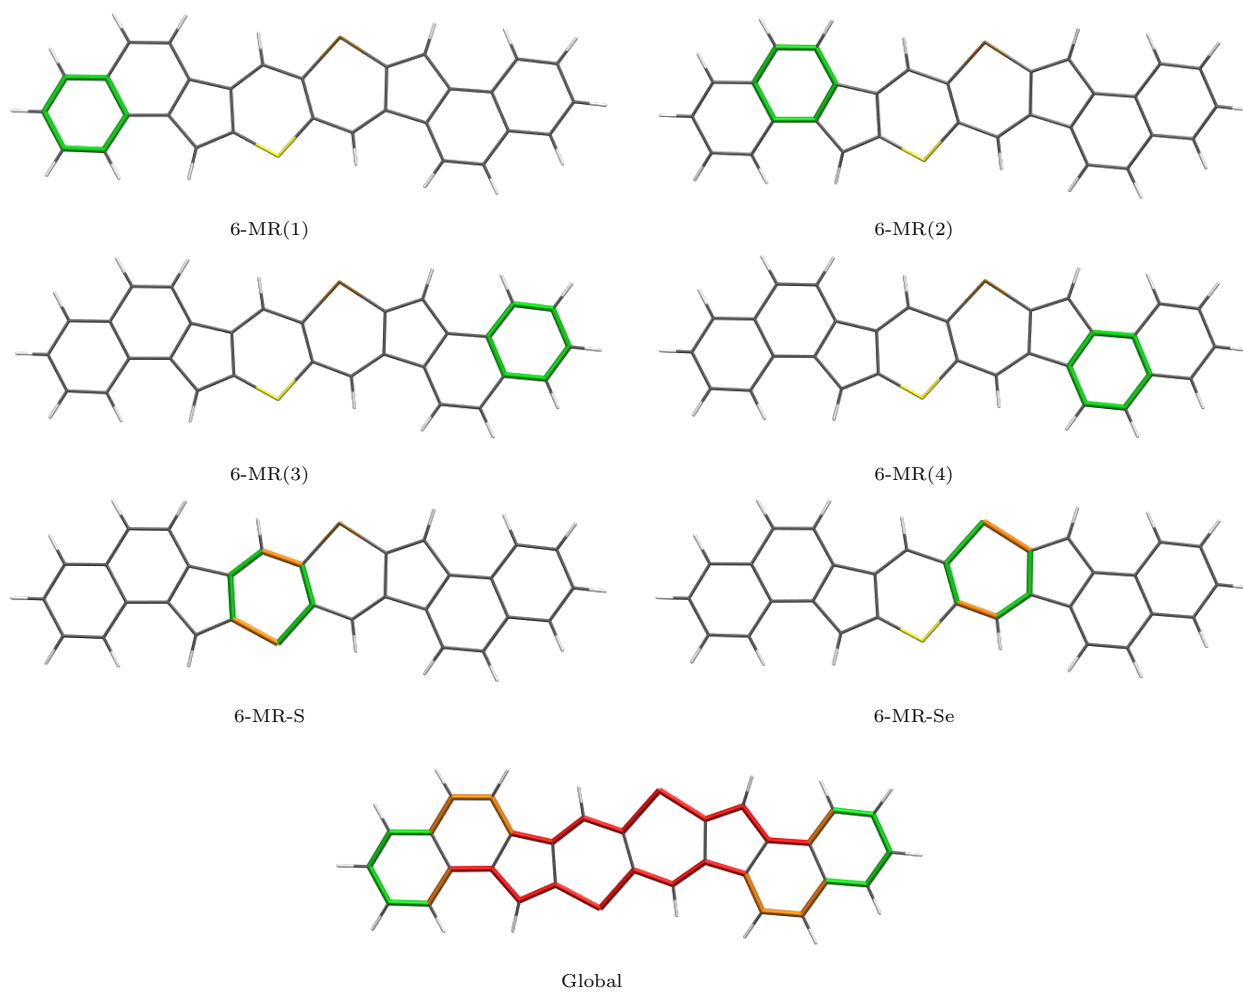

Figure S19: AVmin colored representation across a 6-MR and global circuits in SSe2 molecule. By definition it is not possible to obtain AVmin for rings of 5 atoms. Green, orange, and red colors indicate bond contributions to conjugation that are, respectively, 75-100%, 5-75%, and 0-25%.

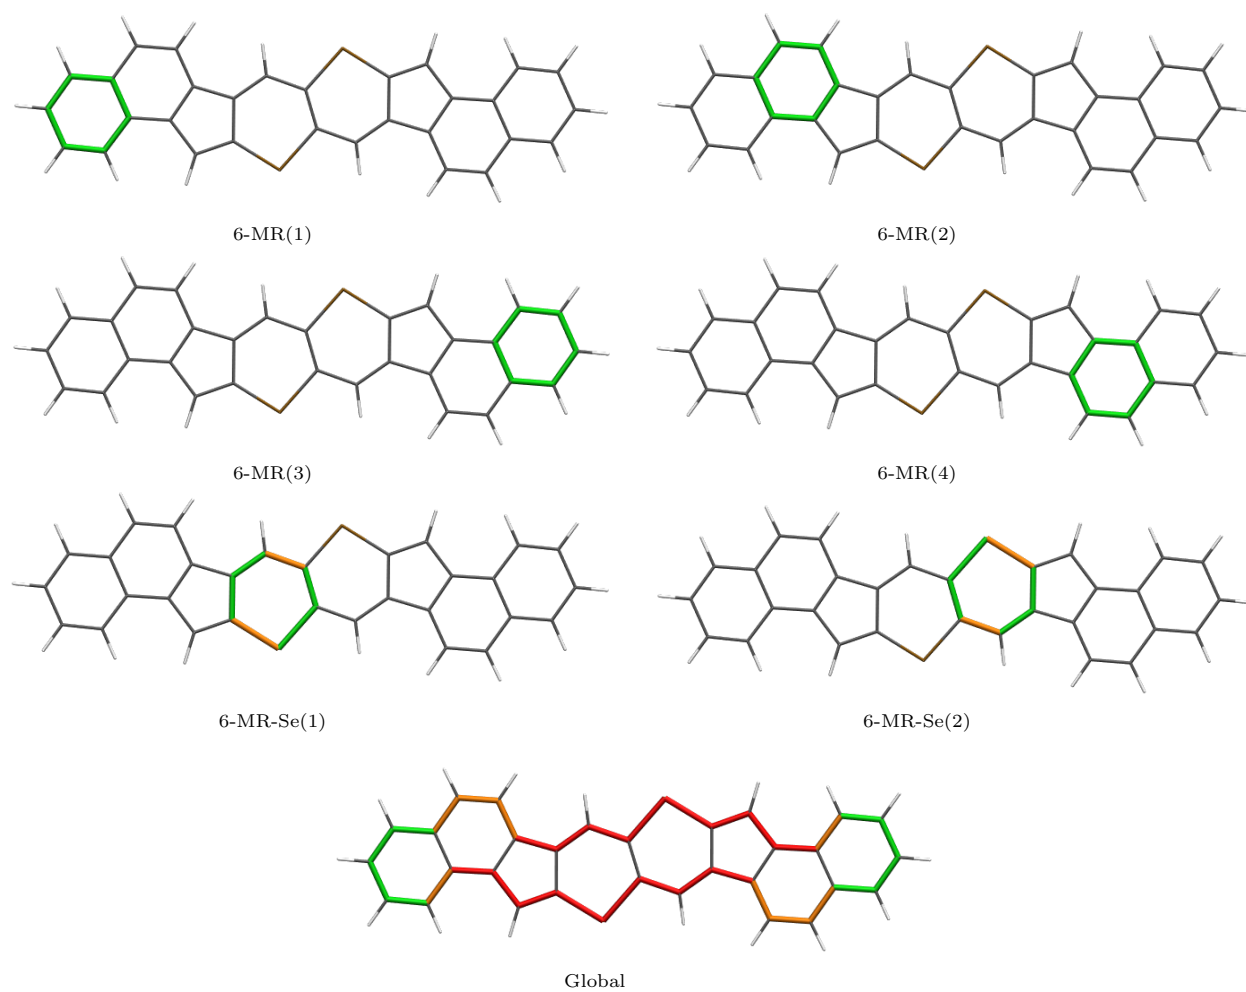

Figure S20: AVmin colored representation across a 6-MR and global circuits in SeSe<sub>2</sub> molecule. By definition it is not possible to obtain AVmin for rings of 5 atoms. Green, orange, and red colors indicate bond contributions to conjugation that are, respectively, 75-100%, 5-75%, and 0-25%.



## 6 Current density maps

CAM-B3LYP

Benzene

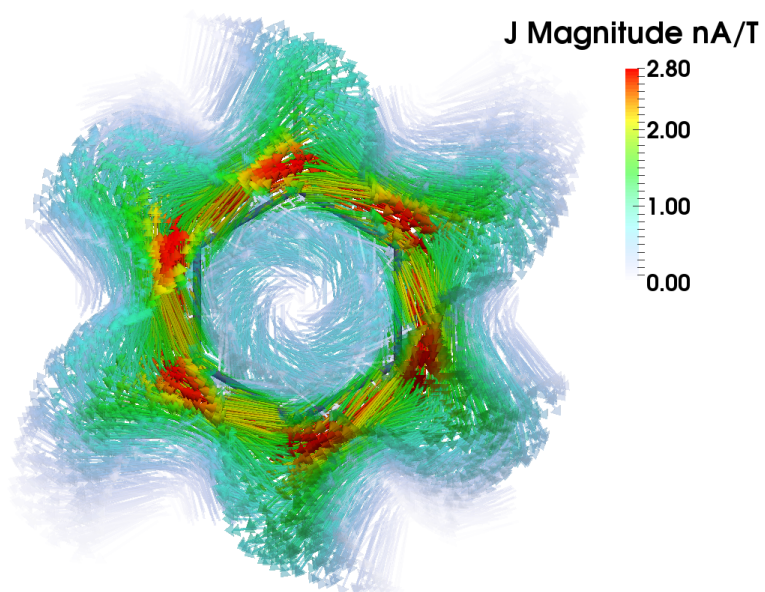

Figure S21: The map shows that  $J$  is diatropic. The methodology used was CAM-B3LYP/6-311G(d,p). White bonds: hydrogen atoms; gray bonds: carbon atoms.

Cyclobutadiene

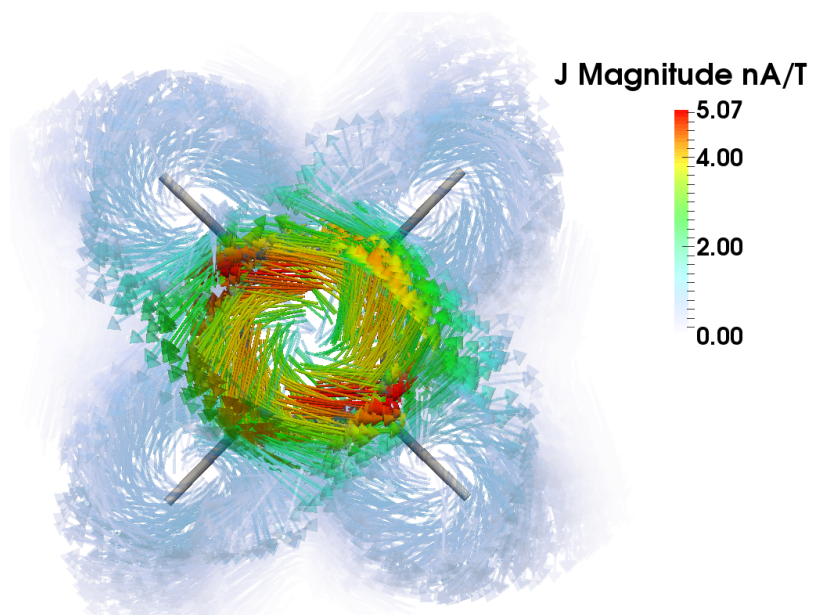

Figure S22: The map shows that  $J$  is paratropic. The methodology used was CAM-B3LYP/6-311G(d,p). White bonds: hydrogen atoms; gray bonds: carbon atoms.

SS1

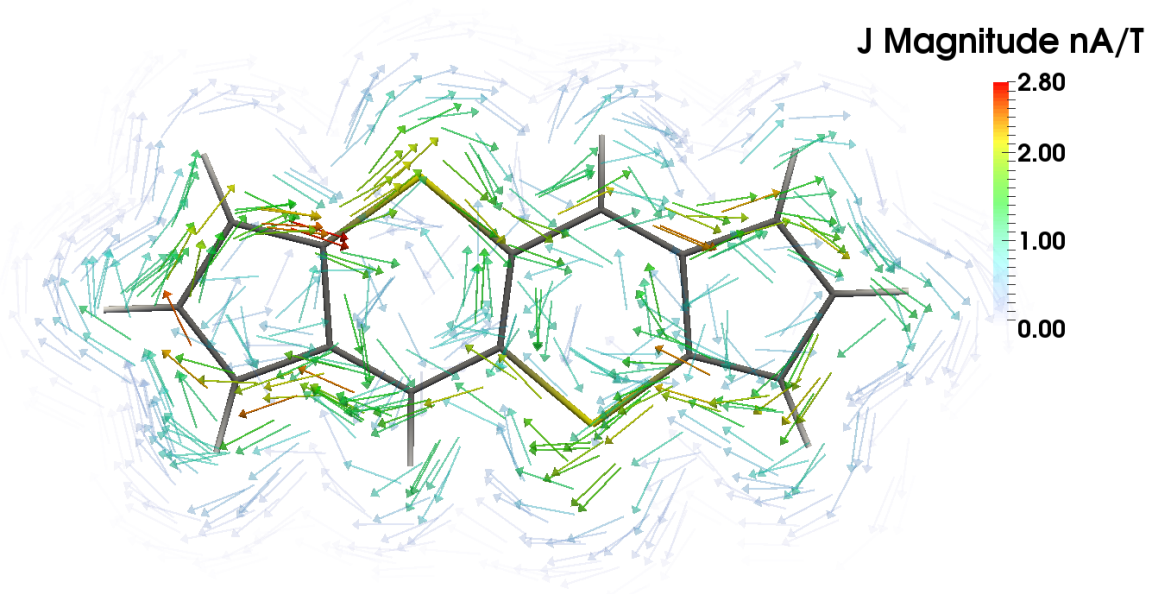

Figure S23: The map shows that  $J$  is diatropic. We use the benzene scale as a reference. The methodology used was CAM-B3LYP/6-311G(d,p). White bonds: hydrogen atoms; gray bonds: carbon atoms; yellow bonds: sulfur atoms.

SSe1

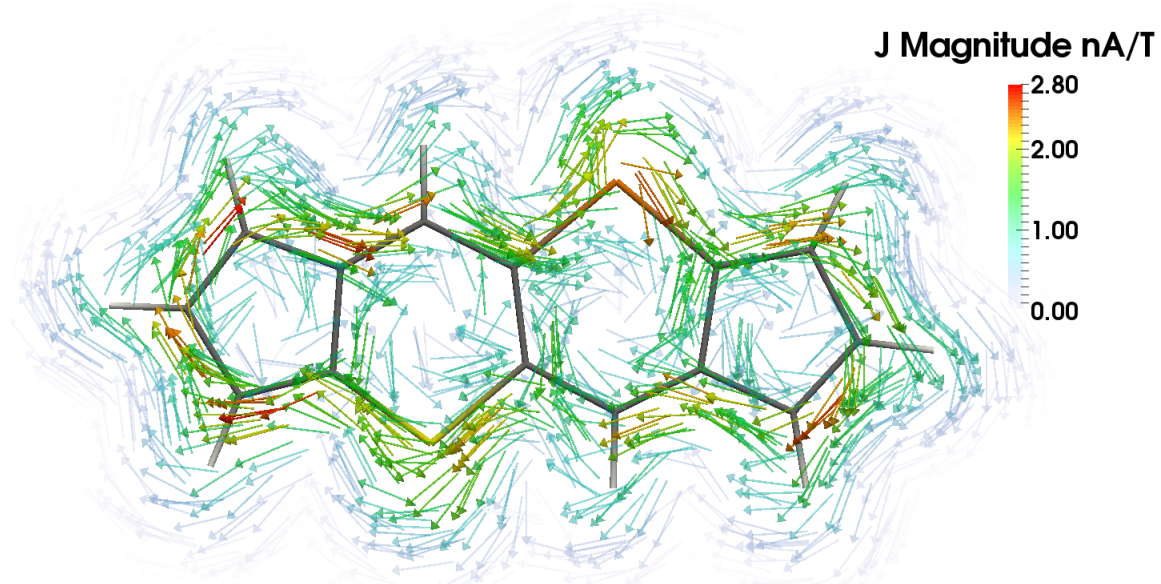

Figure S24: The map shows that  $J$  is diatropic. We use the benzene scale as a reference. The methodology used was CAM-B3LYP/6-311G(d,p). White bonds: hydrogen atoms; gray bonds: carbon atoms; yellow bonds: sulfur atoms; orange bonds: selenium atoms.

### SeSe1

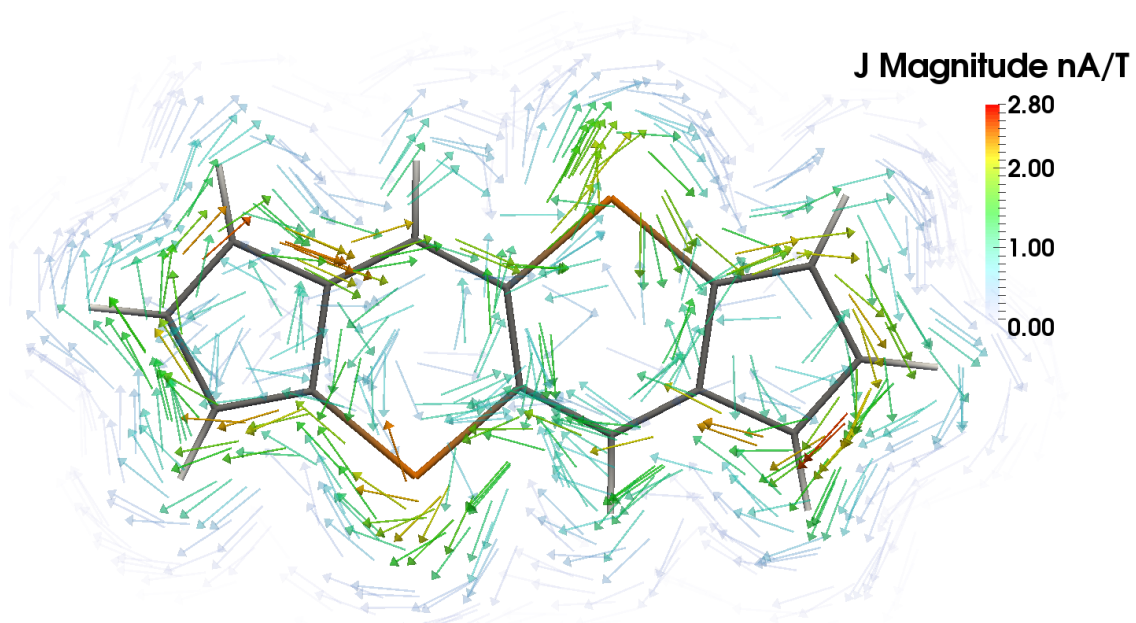

Figure S25: The map shows that  $J$  is diatropic. We use the benzene scale as a reference. The methodology used was CAM-B3LYP/6-311G(d,p). White bonds: hydrogen atoms; gray bonds: carbon atoms; orange bonds: selenium atoms.

### SS

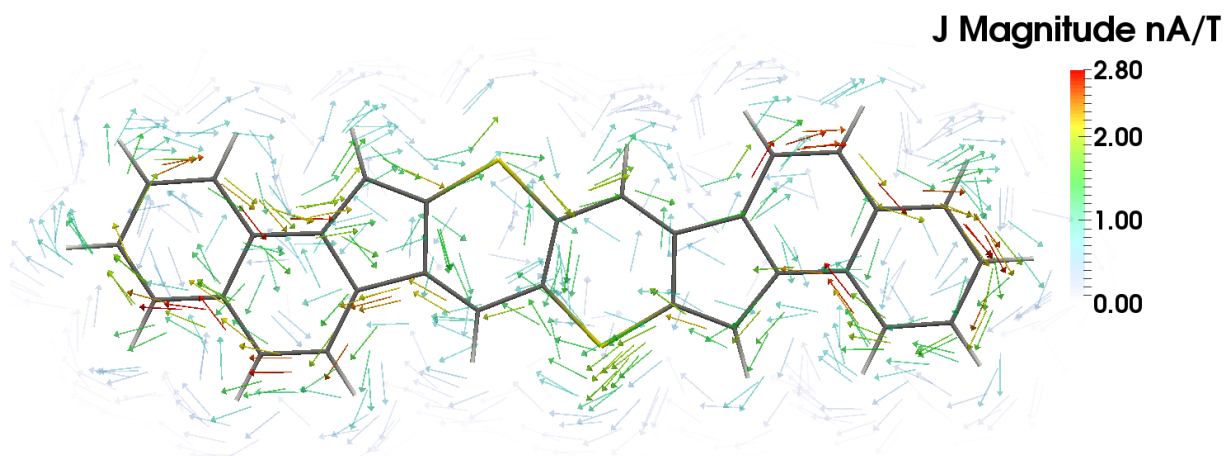

Figure S26: The map shows that  $J$  is diatropic. We use the benzene scale as a reference. The methodology used was CAM-B3LYP/6-311G(d,p). White bonds: hydrogen atoms; gray bonds: carbon atoms; yellow bonds: sulfur atoms.

SSe

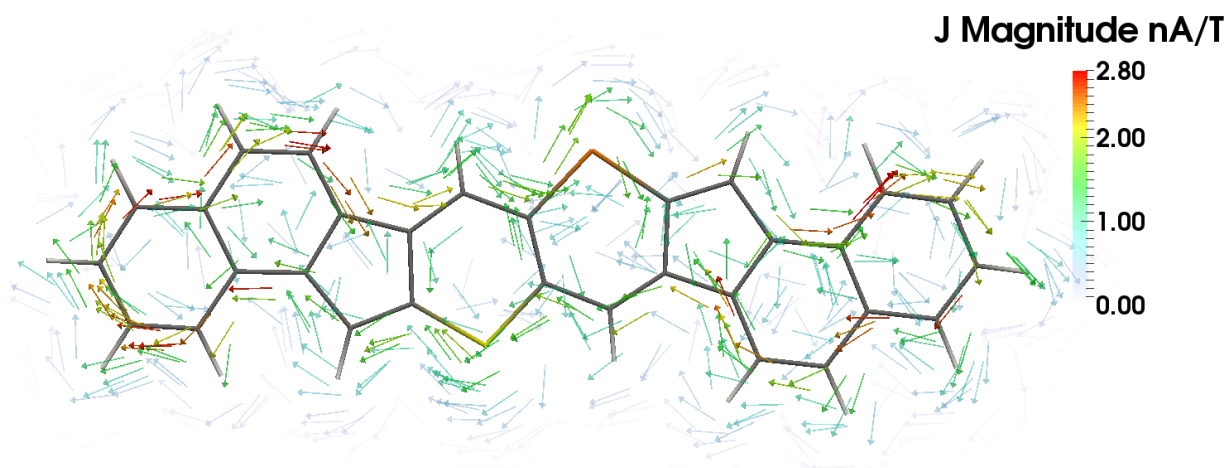

Figure S27: The map shows that J is diatropic. We use the benzene scale as a reference. The methodology used was CAM-B3LYP/6-311G(d,p). White bonds: hydrogen atoms; gray bonds: carbon atoms; yellow bonds: sulfur atoms; orange bonds: selenium atoms.

SeSe

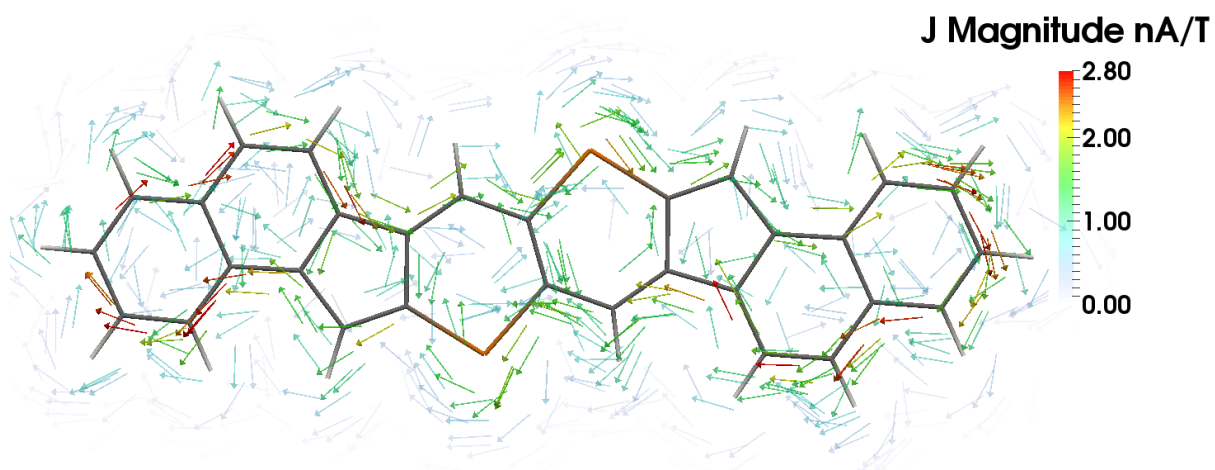

Figure S28: The map shows that J is diatropic. We use the benzene scale as a reference. The methodology used was CAM-B3LYP/6-311G(d,p). White bonds: hydrogen atoms; gray bonds: carbon atoms; orange bonds: selenium atoms.



B3LYP

Benzene

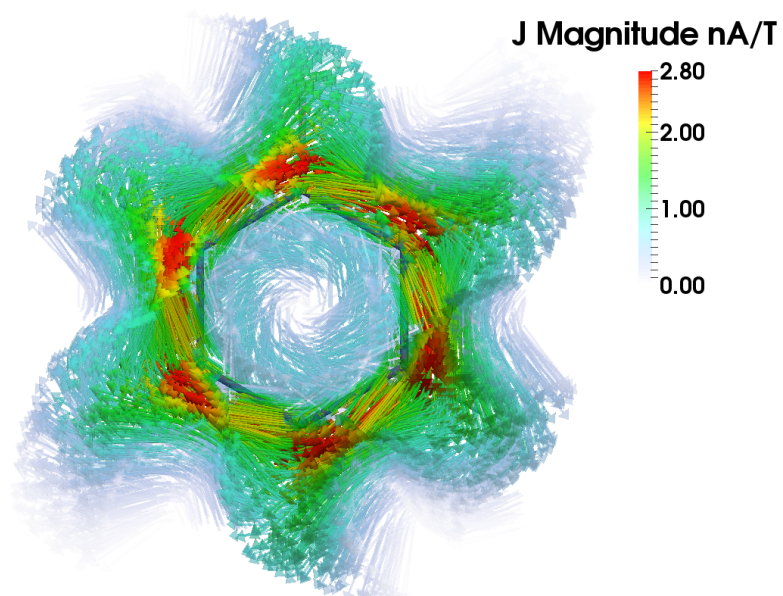

Figure S29: The map shows that J is diatropic. The methodology used was B3LYP/6-311G(d,p). White bonds: hydrogen atoms; gray bonds: carbon atoms.

Cyclobutadiene

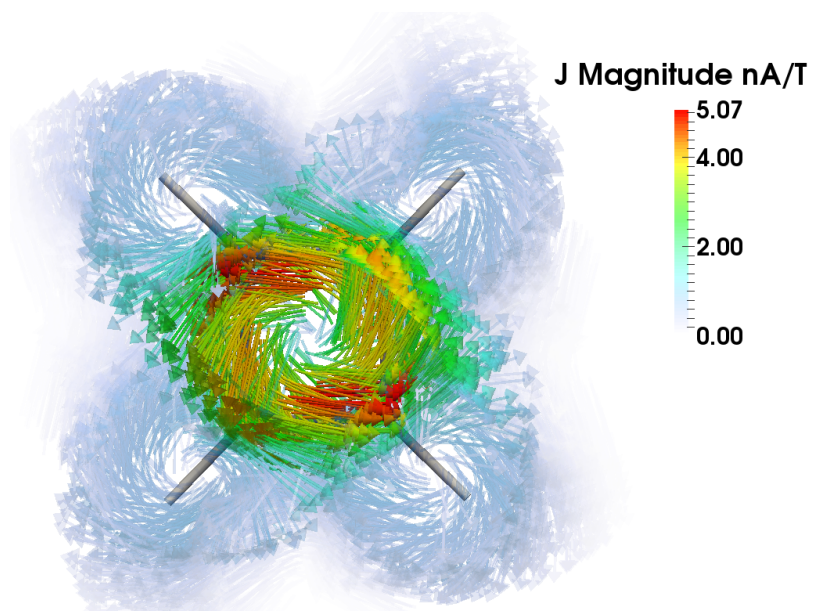

Figure S30: The map shows that J is paratropic. The methodology used was B3LYP/6-311G(d,p). White bonds: hydrogen atoms; gray bonds: carbon atoms.

SS1

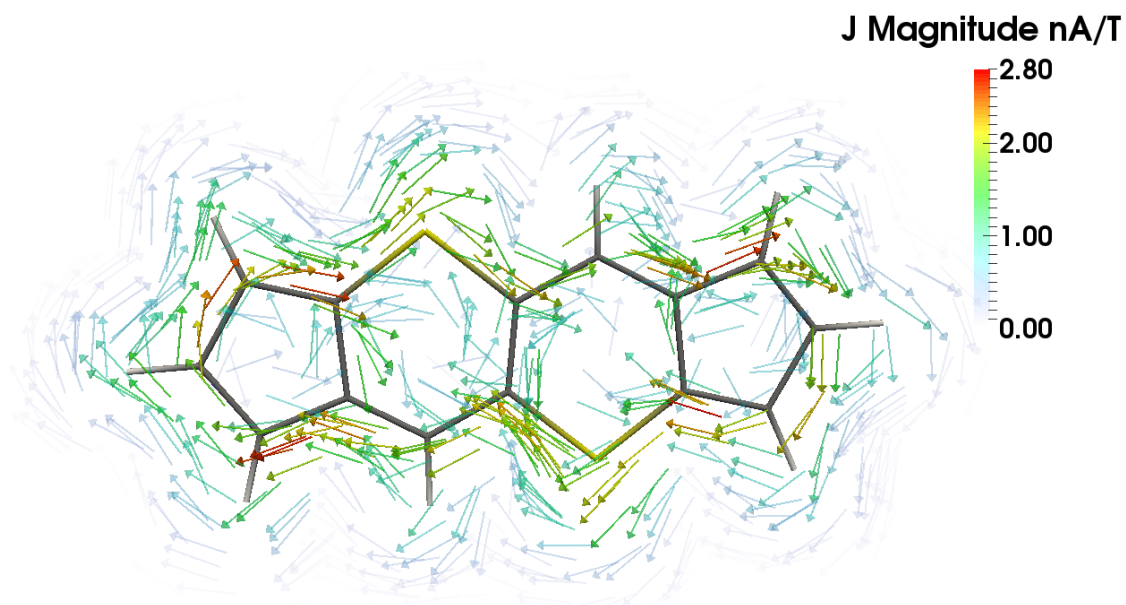

Figure S31: The map shows that  $J$  is diatropic. We use the benzene scale as a reference. The methodology used was B3LYP/6-311G(d,p). White bonds: hydrogen atoms; gray bonds: carbon atoms; yellow bonds: sulfur atoms.

SSe1

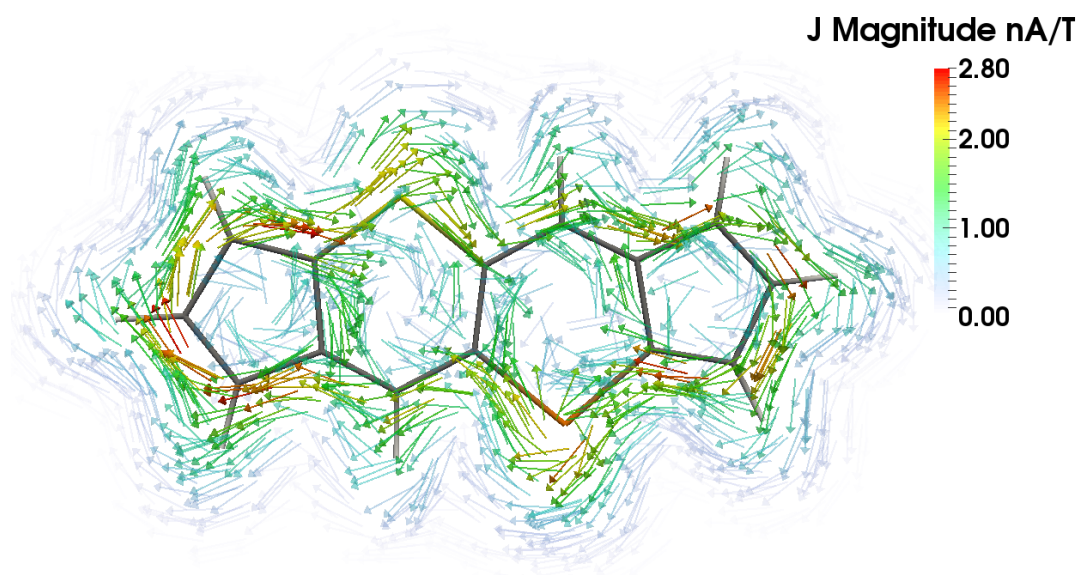

Figure S32: The map shows that  $J$  is diatropic. We use the benzene scale as a reference. The methodology used was B3LYP/6-311G(d,p). White bonds: hydrogen atoms; gray bonds: carbon atoms; yellow bonds: sulfur atoms; orange bonds: selenium atoms.

SeSe1

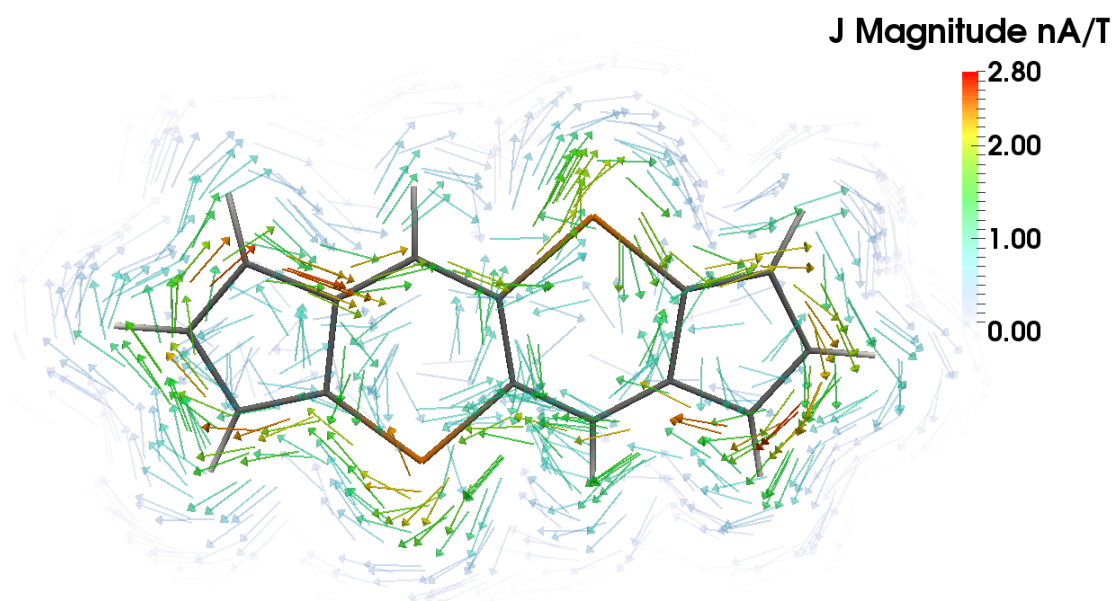

Figure S33: The map shows that J is diatropic. We use the benzene scale as a reference. The methodology used was B3LYP/6-311G(d,p). White bonds: hydrogen atoms; gray bonds: carbon atoms; orange bonds: selenium atoms.

SS

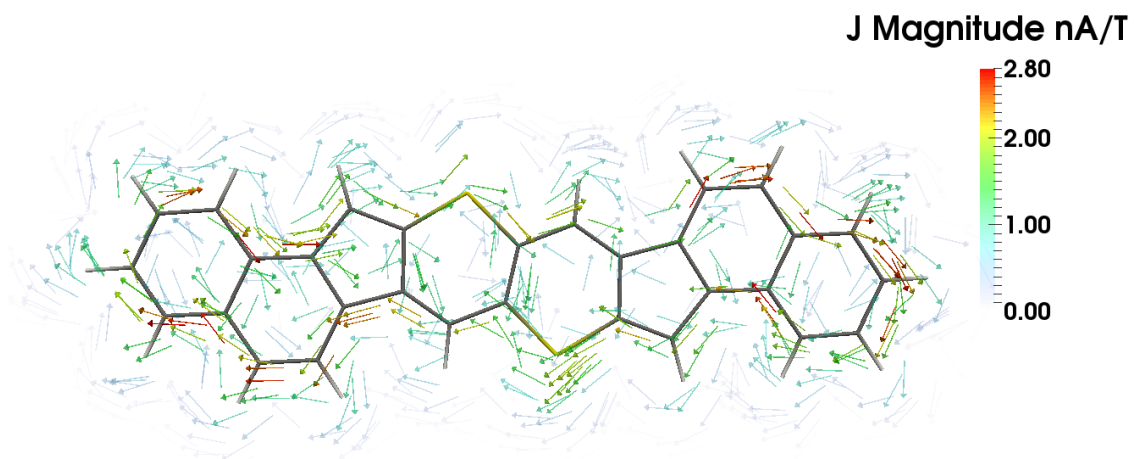

Figure S34: The map shows that J is diatropic. We use the benzene scale as a reference. The methodology used was B3LYP/6-311G(d,p). White bonds: hydrogen atoms; gray bonds: carbon atoms; yellow bonds: sulfur atoms.

SSe

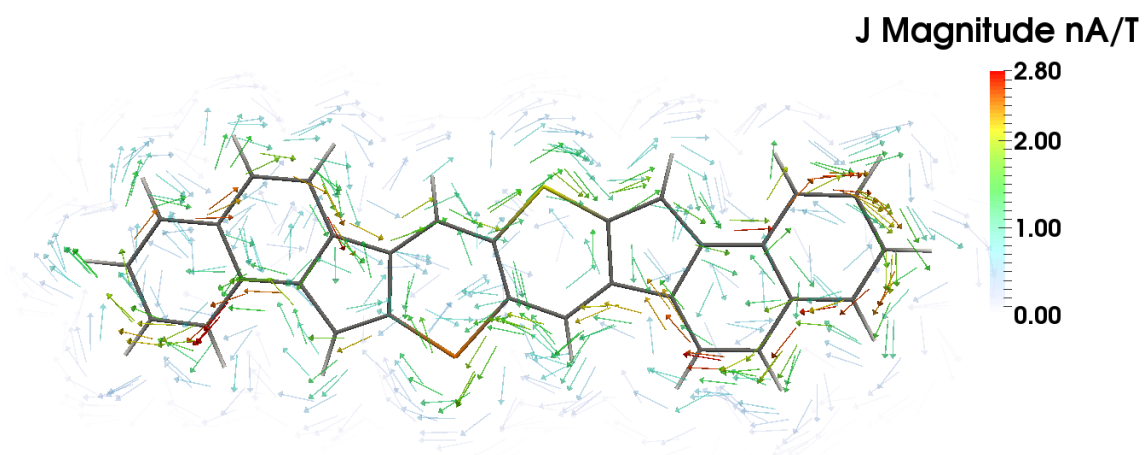

Figure S35: The map shows that J is diatropic. We use the benzene scale as a reference. The methodology used was B3LYP/6-311G(d,p). White bonds: hydrogen atoms; gray bonds: carbon atoms; yellow bonds: sulfur atoms; orange bonds: selenium atoms.

SeSe

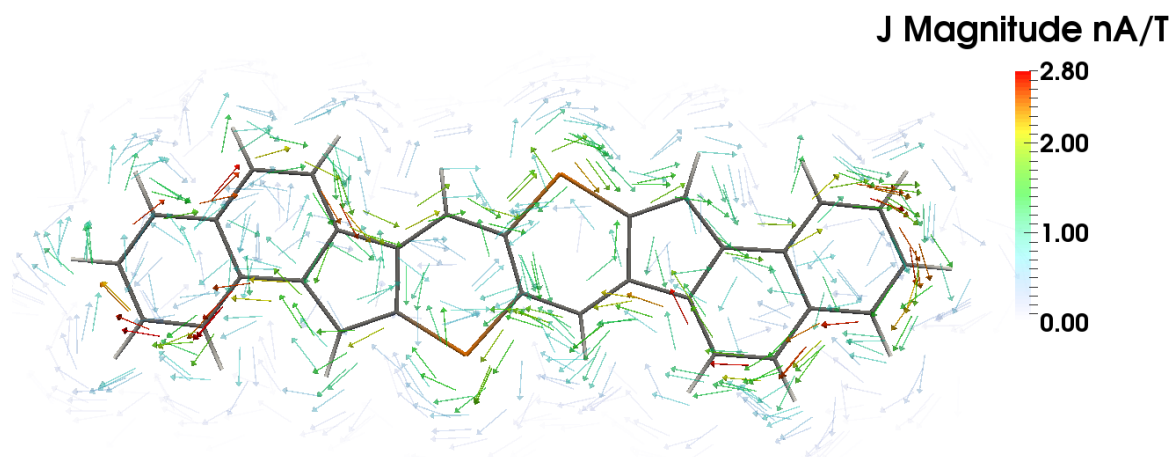

Figure S36: The map shows that J is diatropic. We use the benzene scale as a reference. The methodology used was B3LYP/6-311G(d,p). White bonds: hydrogen atoms; gray bonds: carbon atoms; orange bonds: selenium atoms.



## 7 Cartesian coordinates of the optimized structures with CAM-B3LYP

**SS** E=-1104.72971094 a.u.  $\nu=73.3866$  cm<sup>-1</sup>

H 3.493818 -0.751571 0.521956  
H -3.415528 -1.634314 0.023985  
H -3.493818 0.751571 0.521956  
C 0.174536 -0.709647 -0.217253  
C -2.538281 -1.006413 -0.057291  
C 1.415556 -1.167613 0.030224  
C -1.415556 1.167613 0.030224  
H 3.415528 1.634314 0.023985  
C -2.562259 0.303205 0.198871  
S -1.112422 -1.867646 -0.603786  
H -1.573564 2.236933 0.098795  
C 2.538281 1.006413 -0.057291  
C 2.562259 -0.303205 0.198871  
S 1.112422 1.867646 -0.603786  
C -0.174536 0.709647 -0.217253  
H 1.573564 -2.236933 0.098795

**SSe** E=-3108.15542818 a.u.  $\nu=62.0898$  cm<sup>-1</sup>

H 3.487693 -0.809723 0.520205  
H -3.412659 -1.670844 0.015379  
H -3.534536 0.711389 0.531200  
C 0.165104 -0.676755 -0.221434  
C -2.546742 -1.026479 -0.059873  
C 1.407195 -1.138815 0.017841  
C -1.464121 1.164993 0.034737  
H 3.547272 1.573047 0.061710  
C -2.595615 0.280926 0.205224  
S -1.106676 -1.855871 -0.610206  
H -1.646652 2.230471 0.107440  
C 2.636650 0.999211 -0.044807  
C 2.581114 -0.311542 0.194645  
Se 1.148532 2.008825 -0.625820  
C -0.215075 0.732395 -0.215584  
H 1.548517 -2.211227 0.080343

**SeSe** E=-5111.58112866 a.u.  $\nu=51.8660$  cm<sup>-1</sup>

H 3.529669 -0.770812 0.529566  
H -3.547071 -1.611448 0.054910  
H -3.529669 0.770812 0.529566  
C 0.205499 -0.699062 -0.219942  
C -2.646620 -1.020747 -0.046857  
C 1.455459 -1.136497 0.021736  
C -1.455459 1.136497 0.021736  
H 3.547071 1.611448 0.054910  
C -2.615257 0.289466 0.200770  
Se -1.141585 -1.997501 -0.632751  
H -1.621298 2.205506 0.088068  
C 2.646620 1.020747 -0.046857  
C 2.615257 -0.289466 0.200770  
Se 1.141585 1.997501 -0.632751  
C -0.205499 0.699062 -0.219942  
H 1.621298 -2.205506 0.088068

**SS1** E=-1334.48518877 a.u.  $\nu=49.0205$  cm<sup>-1</sup>

H 4.127005 -2.581048 -0.000232  
H -1.613331 -2.258733 -0.000244  
H -4.127005 2.581048 -0.000232  
H 5.782993 -0.474057 -0.000256  
H 1.613331 2.258733 -0.000244  
H 4.371324 1.764617 -0.000230  
C -4.704102 0.401604 -0.000251  
C -3.988827 -0.755634 -0.000235  
H -5.782993 0.474057 -0.000256  
C 3.818334 -1.546891 -0.000236  
C -3.818334 1.546891 -0.000236  
C -2.546447 1.072587 -0.000241  
C -2.594410 -0.400637 -0.000245  
S -1.054487 1.935242 -0.000241  
C 0.155284 0.671081 -0.000244  
C -0.155284 -0.671081 -0.000244  
C -1.492145 -1.180190 -0.000245  
C 1.492145 1.180190 -0.000245  
C 2.594410 0.400637 -0.000245

C 2.546447 -1.072587 -0.000241  
S 1.054487 -1.935242 -0.000241  
C 3.988827 0.755634 -0.000235  
C 4.704102 -0.401604 -0.000251  
H -4.371324 -1.764617 -0.000230

**SSe1** E=-3337.90962095 a.u.  $\nu=45.0063$  cm<sup>-1</sup>

H 4.178961 2.716240 -0.000213  
H -4.227186 1.927102 -0.000113  
C 3.893979 1.675327 -0.000206  
H -4.227568 -2.422795 -0.000092  
H 1.776453 -2.177528 -0.000172  
H 4.520187 -1.622936 -0.000194  
C -4.685293 -0.212926 -0.000104  
C -3.905575 0.896832 -0.000118  
H -5.766422 -0.226281 -0.000087  
H -1.517173 2.293258 -0.000179  
C -3.858355 -1.408285 -0.000105  
C -2.564308 -1.009024 -0.000124  
C -2.526455 0.462697 -0.000152  
Se -0.998398 -2.016399 -0.000150  
C 0.281244 -0.622553 -0.000168  
C -0.062189 0.708524 -0.000175  
C -1.405857 1.213327 -0.000172  
C 1.626163 -1.102348 -0.000177  
C 2.713988 -0.299994 -0.000190  
C 2.632452 1.171740 -0.000195  
S 1.121926 1.997935 -0.000189  
C 4.114246 -0.623123 -0.000197  
C 4.803848 0.551071 -0.000209  
H 5.880933 0.647137 -0.000217

**SeSe1** E=-5341.33400127 a.u.  $\nu=40.9642$  cm<sup>-1</sup>

H 1.680168 -2.211905 -0.000302  
H -4.378059 1.787806 -0.000327  
H 4.283856 2.561053 -0.000285  
H -5.869630 -0.398786 -0.000305

H -4.283856 -2.561053 -0.000277  
C -3.937296 -1.538619 -0.000291  
C 4.788977 0.362392 -0.000262  
C 4.033227 -0.765086 -0.000292  
H 5.869630 0.398786 -0.000243  
H -1.680168 2.211905 -0.000328  
C 3.937296 1.538619 -0.000287  
C 2.651754 1.110437 -0.000294  
C 2.646543 -0.361625 -0.000297  
Se 1.063789 2.079990 -0.000315  
C -0.188152 0.659174 -0.000313  
C 0.188152 -0.659174 -0.000309  
C 1.539700 -1.135063 -0.000303  
C -1.539700 1.135063 -0.000319  
C -2.646543 0.361625 -0.000317  
C -2.651754 -1.110437 -0.000303  
Se -1.063789 -2.079990 -0.000307  
C -4.033227 0.765086 -0.000319  
C -4.788977 -0.362392 -0.000308  
H 4.378059 -1.787806 -0.000296

**SS2** E=-1948.90125845 a.u.  $\nu=15.0474$  cm<sup>-1</sup>

C -8.321698 1.434529 0.000297  
C -6.957867 1.529043 0.000235  
C -6.151267 0.368423 0.000154  
C -6.776610 -0.908874 0.000137  
C -8.189124 -0.969364 0.000201  
C -8.944247 0.170426 0.000279  
C -4.732750 0.408713 0.000088  
C -3.994428 -0.773427 0.000011  
C -4.623118 -2.032572 -0.000002  
C -5.985877 -2.092330 0.000058  
C -3.823309 1.544009 0.000092  
C -2.558400 1.060022 0.000031  
C -2.589441 -0.410330 -0.000030  
S -1.065007 1.934253 -0.000045  
C 0.151341 0.668114 -0.000045  
C -0.151341 -0.668113 -0.000041

C -1.489554 -1.185817 -0.000053  
C 1.489554 1.185817 -0.000066  
C 2.589441 0.410330 -0.000039  
C 2.558400 -1.060021 0.000036  
S 1.065007 -1.934253 -0.000047  
C 3.994428 0.773427 -0.000000  
C 4.732750 -0.408713 0.000090  
C 3.823310 -1.544009 0.000103  
C 4.623118 2.032572 -0.000021  
C 5.985877 2.092330 0.000043  
C 6.776610 0.908874 0.000135  
C 6.151267 -0.368423 0.000161  
C 8.189124 0.969364 0.000203  
C 8.944247 -0.170425 0.000294  
C 8.321698 -1.434528 0.000321  
C 6.957867 -1.529043 0.000256  
H -8.928524 2.331748 0.000358  
H -6.482445 2.502159 0.000248  
H -8.667155 -1.942459 0.000188  
H -10.025573 0.105329 0.000328  
H -4.035064 -2.943125 -0.000064  
H -6.492610 -3.050047 0.000045  
H -4.110020 2.584283 0.000144  
H -1.604361 -2.264703 -0.000076  
H 1.604361 2.264703 -0.000098  
H 4.110021 -2.584283 0.000165  
H 4.035064 2.943125 -0.000094  
H 6.492611 3.050048 0.000023  
H 8.667155 1.942459 0.000183  
H 10.025573 -0.105328 0.000346  
H 8.928524 -2.331748 0.000393  
H 6.482445 -2.502159 0.000276

**SSe2** E=-3952.32619463 a.u.  $\nu=14.3482$  cm<sup>-1</sup>

C -8.352475 -1.048049 0.000266  
C -6.996289 -1.217551 0.000223  
C -6.126922 -0.102516 0.000133  
C -6.681818 1.207301 0.000088

C -8.089338 1.345159 0.000134  
C -8.905328 0.248614 0.000221  
C -4.713830 -0.218589 0.000084  
C -3.911104 0.918270 -0.000003  
C -4.468906 2.209422 -0.000045  
C -5.827195 2.344125 -0.000001  
C -3.863497 -1.402493 0.000113  
C -2.575488 -0.991140 0.000049  
C -2.522867 0.477627 -0.000025  
Se -1.009592 -2.009915 0.000006  
C 0.277372 -0.616945 -0.000028  
C -0.058693 0.708565 -0.000049  
C -1.402255 1.222245 -0.000063  
C 1.624545 -1.105518 -0.000041  
C 2.709342 -0.307394 -0.000034  
C 2.645708 1.161603 0.000004  
S 1.133239 2.000859 -0.000087  
C 4.121188 -0.639352 0.000001  
C 4.833472 0.559162 0.000060  
C 3.899840 1.673909 0.000058  
C 4.777899 -1.884403 0.000001  
C 6.141467 -1.914187 0.000057  
C 6.906055 -0.713392 0.000119  
C 6.252808 0.549767 0.000122  
C 8.319453 -0.742830 0.000178  
C 9.049474 0.413319 0.000239  
C 8.399352 1.663334 0.000242  
C 7.033669 1.727737 0.000185  
H -9.007718 -1.910557 0.000335  
H -6.575194 -2.215391 0.000257  
H -8.513266 2.343008 0.000100  
H -9.981493 0.372418 0.000255  
H -3.832502 3.086814 -0.000114  
H -6.279796 3.328624 -0.000035  
H -4.209558 -2.424912 0.000177  
H -1.505285 2.302648 -0.000101  
H 1.768200 -2.181242 -0.000055  
H 4.163415 2.720268 0.000096

H 4.210152 -2.807795 -0.000046  
H 6.669270 -2.860466 0.000055  
H 8.818764 -1.705191 0.000175  
H 10.131975 0.371919 0.000284  
H 8.986249 2.573721 0.000290  
H 6.536889 2.690125 0.000188

**SeSe2** E=-5955.75114957  $\nu=13.3622$  cm<sup>-1</sup>

C 8.438421 1.276676 0.000676  
C 7.078811 1.416828 0.000556  
C 6.233676 0.283404 0.000373  
C 6.816659 -1.014086 0.000316  
C 8.226741 -1.121584 0.000442  
C 9.019032 -0.007695 0.000618  
C 4.818208 0.369311 0.000241  
C 4.040009 -0.784929 0.000068  
C 4.625935 -2.063795 0.000018  
C 5.986665 -2.169244 0.000137  
C 3.943008 1.534394 0.000268  
C 2.664010 1.094831 0.000124  
C 2.643282 -0.374436 -0.000002  
Se 1.075876 2.077340 -0.000043  
C -0.184752 0.656721 -0.000041  
C 0.184752 -0.656721 -0.000038  
C 1.536946 -1.141840 -0.000061  
C -1.536946 1.141840 -0.000070  
C -2.643281 0.374436 -0.000006  
C -2.664010 -1.094831 0.000129  
Se -1.075876 -2.077340 -0.000041  
C -4.040009 0.784929 0.000061  
C -4.818208 -0.369311 0.000244  
C -3.943008 -1.534394 0.000277  
C -4.625935 2.063796 0.000006  
C -5.986665 2.169244 0.000127  
C -6.816659 1.014086 0.000315  
C -6.233676 -0.283404 0.000379  
C -8.226741 1.121584 0.000444  
C -9.019032 0.007695 0.000628

C -8.438421 -1.276676 0.000693  
C -7.078811 -1.416828 0.000570  
H 9.074881 2.153143 0.000815  
H 6.636250 2.405334 0.000600  
H 8.672089 -2.110071 0.000398  
H 10.097616 -0.108361 0.000713  
H 4.008747 -2.954846 -0.000120  
H 6.460467 -3.143723 0.000094  
H 4.266767 2.564075 0.000388  
H 1.668733 -2.219414 -0.000120  
H -1.668733 2.219414 -0.000137  
H -4.266767 -2.564075 0.000404  
H -4.008747 2.954846 -0.000139  
H -6.460467 3.143723 0.000080  
H -8.672089 2.110071 0.000395  
H -10.097616 0.108361 0.000726  
H -9.074881 -2.153143 0.000839  
H -6.636250 -2.405334 0.000620



## References

- [1] T. Yanai, D. P. Tew, and N. C. Handy, A new hybrid exchange–correlation functional using the coulomb-attenuating method (cam-b3lyp), *Chemical Physics Letters*, 2004, **393**, 51–57.
- [2] A. D. Becke, Density-functional thermochemistry. iii. the role of exact exchange, *The Journal of Chemical Physics*, 1993, **98**, 5648–5652.
- [3] R. Krishnan, J. S. Binkley, R. Seeger, and J. A. Pople, Self-consistent molecular orbital methods. XX. A basis set for correlated wave functions, *The Journal of Chemical Physics*, 1980, **72**, 650–654.
- [4] S. Grimme, S. Ehrlich, and L. Goerigk, Effect of the damping function in dispersion corrected density functional theory, *Journal of Computational Chemistry*, 2011, **32**, 1456–1465.
- [5] D. W. Szczepanik, M. Andrzejak, J. Dominikowska, B. Pawelek, T. M. Krygowski, H. Szatyłowicz, and M. Solà, The electron density of delocalized bonds (eddb) applied for quantifying aromaticity, *Physical Chemistry Chemical Physics*, 2017, **19**, 28970–28981.
- [6] D. W. Szczepanik and M. Solà in *Aromaticity*, ed. I. Fernandez; Elsevier, 2021; pp. 259–284.
- [7] C. L. F. Weinhold and E. Glendening, What is nbo analysis and how is it useful?, *International Reviews in Physical Chemistry*, 2016, **35**, 399–440.
- [8] M. J. Frisch, G. W. Trucks, H. B. Schlegel, G. E. Scuseria, M. A. Robb, J. R. Cheeseman, G. Scalmani, V. Barone, G. A. Petersson, H. Nakatsuji, X. Li, M. Caricato, A. V. Marenich, J. Bloino, B. G. Janesko, R. Gomperts, B. Mennucci, H. P. Hratchian, J. V. Ortiz, A. F. Izmaylov, J. L. Sonnenberg, D. Williams-Young, F. Ding, F. Lipparini, F. Egidi, J. Goings, B. Peng, A. Petrone, T. Henderson, D. Ranasinghe, V. G. Zakrzewski, J. Gao, N. Rega, G. Zheng, W. Liang, M. Hada, M. Ehara, K. Toyota, R. Fukuda, J. Hasegawa, M. Ishida, T. Nakajima, Y. Honda, O. Kitao, H. Nakai, T. Vreven, K. Throssell, J. A. Montgomery, Jr., J. E. Peralta, F. Ogliaro, M. J. Bearpark, J. J. Heyd, E. N. Brothers, K. N. Kudin, V. N. Staroverov, T. A. Keith, R. Kobayashi, J. Normand, K. Raghavachari, A. P. Rendell, J. C. Burant, S. S. Iyengar, J. Tomasi, M. Cossi, J. M. Millam, M. Klene, C. Adamo, R. Cammi, J. W. Ochterski, R. L. Martin, K. Morokuma, O. Farkas, J. B. Foresman, and D. J. Fox, Gaussian 16 Revision C.01, 2016.
- [9] E. Matito, An electronic aromaticity index for large rings, *Physical Chemistry Chemical Physics*, 2016, **18**, 11839–11846.
- [10] C. García-Fernández, E. Sierda, M. Abadía, B. Bugenhagen, M. H. Prosenc, R. Wiesendanger, M. Bazarnik, J. E. Ortega, J. Brede, E. Matito, and A. Arnau, Exploring the relation between intramolecular conjugation and band dispersion in one-dimensional polymers, *The Journal of Physical Chemistry C*, 2017, **121**, 27118–27125.
- [11] E. Matito, M. Solà, P. Salvador, and M. Duran, Electron sharing indexes at the correlated level. application to aromaticity calculations, *Faraday Discussions Journal*, 2007, **135**, 325–345.
- [12] Bader, *Atoms in molecules: A Quantum Theory*, Oxford University, New York, 1990.
- [13] T. A. Keith, Aimall (version 14.11.23), 2014.
- [14] E. Matito, ESI-3D: Electron sharing indices program for 3D molecular space partitioning, 2015.
- [15] E. Matito, M. Duran, and M. Solà, The aromatic fluctuation index (flu): a new aromaticity index based on electron delocalization, *The Journal of Chemical Physics*, 2005, **122**, 014109.
- [16] K. Ruud, T. Helgaker, K. L. Bak, P. Jørgensen, and H. J. A. Jensen, Hartree–fock limit magnetizabilities from london orbitals, *The Journal of Chemical Physics*, 1993, **99**, 3847–3859.
- [17] H. Fliegl, S. Taubert, O. Lehtonen, and D. Sundholm, The gauge including magnetically induced current method, *Physical Chemistry Chemical Physics*, 2011, **13**, 20500–20518.
- [18] A. Hendersson, Paraview guide, a parallel visualization application Kitware Inc, 2007.
- [19] V. A. Dixit and Y. Y. Singh, How much aromatic are naphthalene and graphene?, *Computational and Theoretical Chemistry*, 2019, **1162**, 112504.
